# Supplementary material for: A pragmatic method for electronic medical record-based observational studies: developing an electronic medical records retrieval system for clinical research
Source: PubMed Central journal article supplement — BMJ Open. 2012 Oct 31;2(6):e001622. doi: 10.1136/bmjopen-2012-001622 (PMC3533000; doi:10.1136/bmjopen-2012-001622), 2012-10-31
Supplement: bmjopen-2012-001622.draft_revisions.pdf [file bmjopen-2012-001622.draft_revisions.pdf]

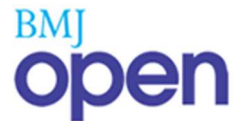

**A pragmatic method for electronic medical record-based observational studies: developing an electronic medical records retrieval system for clinical research**

|                                 |                                                                                                                                                                                                                                                                                                                                                                                                                                                                                                                                                                                                                                                                                                                                                                                                                                                                                                                                                                                                                                                                                                     |
|---------------------------------|-----------------------------------------------------------------------------------------------------------------------------------------------------------------------------------------------------------------------------------------------------------------------------------------------------------------------------------------------------------------------------------------------------------------------------------------------------------------------------------------------------------------------------------------------------------------------------------------------------------------------------------------------------------------------------------------------------------------------------------------------------------------------------------------------------------------------------------------------------------------------------------------------------------------------------------------------------------------------------------------------------------------------------------------------------------------------------------------------------|
| Journal:                        | <i>BMJ Open</i>                                                                                                                                                                                                                                                                                                                                                                                                                                                                                                                                                                                                                                                                                                                                                                                                                                                                                                                                                                                                                                                                                     |
| Manuscript ID:                  | bmjopen-2012-001622                                                                                                                                                                                                                                                                                                                                                                                                                                                                                                                                                                                                                                                                                                                                                                                                                                                                                                                                                                                                                                                                                 |
| Article Type:                   | Research                                                                                                                                                                                                                                                                                                                                                                                                                                                                                                                                                                                                                                                                                                                                                                                                                                                                                                                                                                                                                                                                                            |
| Date Submitted by the Author:   | 28-Jun-2012                                                                                                                                                                                                                                                                                                                                                                                                                                                                                                                                                                                                                                                                                                                                                                                                                                                                                                                                                                                                                                                                                         |
| Complete List of Authors:       | Yamamoto, Keiichi; Kyoto University Hospital, Department of Clinical Trial Design and Management, Translational Research Center<br>Sumi, Eriko; Kyoto University Hospital, Department of Clinical Innovative Medicine, Translational Research Center<br>Yamazaki, Toru; Kyoto University, Department of Oral and Maxillofacial Surgery, Graduate School of Medicine<br>Asai, Keita; Kyoto University, Department of Oral and Maxillofacial Surgery, Graduate School of Medicine<br>Yamori, Masashi; Kyoto University, Department of Oral and Maxillofacial Surgery, Graduate School of Medicine<br>Teramukai, Satoshi; Kyoto University Hospital, Department of Clinical Trial Design and Management, Translational Research Center<br>Bessho, Kazuhisa; Kyoto University, Department of Oral and Maxillofacial Surgery, Graduate School of Medicine<br>Yokode, Masayuki; Kyoto University Hospital, Department of Clinical Innovative Medicine, Translational Research Center<br>Fukushima, Masanori; Foundation for Biomedical Research and Innovation, Translational Research Informatics Center |
| <b>Primary Subject Heading</b>: | Health informatics                                                                                                                                                                                                                                                                                                                                                                                                                                                                                                                                                                                                                                                                                                                                                                                                                                                                                                                                                                                                                                                                                  |
| Secondary Subject Heading:      | Public health, Research methods, Epidemiology                                                                                                                                                                                                                                                                                                                                                                                                                                                                                                                                                                                                                                                                                                                                                                                                                                                                                                                                                                                                                                                       |
| Keywords:                       | Health informatics < BIOTECHNOLOGY & BIOINFORMATICS, ORAL & MAXILLOFACIAL SURGERY, PUBLIC HEALTH, STATISTICS & RESEARCH METHODS, Clinical trials < THERAPEUTICS                                                                                                                                                                                                                                                                                                                                                                                                                                                                                                                                                                                                                                                                                                                                                                                                                                                                                                                                     |
|                                 |                                                                                                                                                                                                                                                                                                                                                                                                                                                                                                                                                                                                                                                                                                                                                                                                                                                                                                                                                                                                                                                                                                     |

SCHOLARONE™  
Manuscripts

1  
2  
3  
4 **A pragmatic method for electronic medical record-based observational studies:**  
5  
6  
7 **developing an electronic medical records retrieval system for clinical research**  
8  
9

10 Keiichi Yamamoto<sup>1</sup>, Eriko Sumi<sup>2</sup>, Toru Yamazaki<sup>3</sup>, Keita Asai<sup>3</sup>, Masashi Yamori<sup>3</sup>, Satoshi  
11 Teramukai<sup>1</sup>, Kazuhisa Bessho<sup>3</sup>, Masayuki Yokode<sup>2</sup>, Masanori Fukushima<sup>4</sup>  
12  
13  
14  
15

16  
17 <sup>1</sup>Department of Clinical Trial Design and Management, Translational Research Centre, Kyoto  
18 University Hospital, Kyoto, Japan  
19  
20  
21  
22

23  
24 <sup>2</sup>Department of Clinical Innovative Medicine, Translational Research Centre, Kyoto  
25 University Hospital, Kyoto, Japan  
26  
27  
28

29  
30  
31 <sup>3</sup>Department of Oral and Maxillofacial Surgery, Graduate School of Medicine, Kyoto  
32 University, Kyoto, Japan  
33  
34  
35

36  
37 <sup>4</sup>Translational Research Informatics Centre, Foundation for Biomedical Research and  
38 Innovation, Kobe, Japan  
39  
40  
41

42  
43  
44 Corresponding author: Keiichi Yamamoto, 54 Shogoin Kawahara-cho, Sakyo-ku, Kyoto,  
45 606-8507 Japan. E-mail: [kyamamo@kuhp.kyoto-u.ac.jp](mailto:kyamamo@kuhp.kyoto-u.ac.jp), Tel: +81-75-751-4717, Fax  
46 +81-75-751-3399  
47  
48  
49  
50

51  
52  
53  
54 Total number of words: 3,542  
55

56  
57  
58 Short title: A pragmatic method for EMR-based observational studies  
59  
60

1  
2  
3  
4 Keywords: clinical research informatics, data warehouse, OLAP, computable eligibility  
5  
6  
7 criteria, pharmacoepidemiology, hospital-based cohort study  
8  
9  
10  
11  
12  
13  
14  
15  
16  
17  
18  
19  
20  
21  
22  
23  
24  
25  
26  
27  
28  
29  
30  
31  
32  
33  
34  
35  
36  
37  
38  
39  
40  
41  
42  
43  
44  
45  
46  
47  
48  
49  
50  
51  
52  
53  
54  
55  
56  
57  
58  
59  
60

For peer review only

**ABSTRACT**

**Objective:** Utilising data collected via electronic medical records (EMRs) is necessary to improve clinical research efficiency. However, it is not easy to identify patients who meet research eligibility criteria and collect the necessary information from EMRs, as the data collection process must integrate various techniques, including developing a data warehouse and translating eligibility criteria into computable criteria. This research aims to establish a pragmatic method optimised for patient identification and collect necessary clinical research information from EMRs. **Design:** Qualitative analyses. **Participants:** At our hospital, 800,000 cases of clinical information have been stored in EMRs. **Primary and secondary outcome measures:** To evaluate the feasibility and usefulness of the ERS, the method to convert text form eligible criteria to computable criteria, and a reconfirmation method to increase research data accuracy. **Results:** To comprehensively and efficiently collect information from patients participating in clinical research, we developed an EMR retrieval system (ERS). To design the ERS database, we modified the star schema and designed a new multi-dimensional data model optimised for patient identification. We also devised practical methods to translate narrative eligibility criteria into computable parameters. We applied the system to an actual hospital-based cohort study performed at our hospital. We converted the test results into computable criteria. Based on this information, we identified eligible patients and extracted data necessary for confirmation by our investigators and statistical analyses with our ERS.

1  
2  
3  
4 **Conclusion:** We propose a pragmatic methodology to identify patients from EMRs who met  
5  
6  
7 clinical research eligibility criteria. Our ERS allowed for the efficient collection of  
8  
9  
10 information on the eligibility of a given patient. The method proposed here reduces the labour  
11  
12  
13 required from the investigators. We believe an efficient ERS is essential to facilitate clinical  
14  
15  
16 research that utilises EMRs.

## 17 18 19 **ARTICLE SUMMARY**

### 20 21 22 **Article focus**

23  
24  
25  
26  
27 To establish a pragmatic methodology to efficiently collect information from patients who  
28  
29  
30 meet clinical research eligibility criteria from EMRs.  
31

### 32 33 34 **Key messages**

35  
36  
37 Utilising data collected as electronic medical records (EMRs) is necessary to improve clinical  
38  
39  
40 research efficiency. However, it is not easy to identify patients who meet research eligibility  
41  
42  
43 criteria and collect necessary data from EMRs, as the data collection process must integrate  
44  
45  
46 various techniques, including developing a data warehouse and translating eligibility criteria  
47  
48  
49 into computable criteria. An efficient ERS that integrates these techniques is essential to  
50  
51  
52 facilitate clinical research that utilises EMRs.  
53

### 54 55 56 **Strengths and limitations of this study**

57  
58  
59  
60

- The strengths of our method include using a specialised data model for patient identification in clinical research and efficient data conversion without being conscious of the EMR database structure when converting narrative criteria to computable criteria.
- Our ERS cannot retrieve information that is not in the data model. It is thus necessary to create eligibility criteria assuming the use of our ERS in the protocol development stage.
- Enabling ERS use in multiple institutions is an important future task.

## BACKGROUND

Medical information technology has recently advanced in many countries, and enormous amounts of clinical data are already stored as electronic medical records (EMRs). Utilising the data collected in EMRs is necessary to improve clinical research efficiency. An EMR is a large database of patient data and is used in observational research investigating the relationships among diseases, treatments, and outcomes; conducting surveillance for rare drug reactions; and recruiting patients for clinical trials [1-10]. However, it is not easy to identify patients who meet research eligibility criteria and collect necessary information from EMRs. Herein, we describe three major issues concerning EMR-based observational studies: EMR patient data retrieval function, eligibility criteria protocol representation, and EMR data accuracy. [11-14]

To identify patients who meet research eligibility criteria, it is necessary to obtain various types of information stored in EMRs by subject, e.g., diagnosis and prescribed medications. However, because the EMR database structure is designed to facilitate online transaction processing to enable rapid and detail-oriented clinical information searches and updates on individual patients [12-13], current EMR system do not facilitate this retrieval function [11-13, 15]. Data warehouses are essential components of data-driven decision support. To allow efficient research analyses, EMR data must first be warehoused to allow data analyses across patient populations [16-23]. However, health care data modelling is difficult and

1  
2  
3  
4 time-consuming because of the complexity of the medical knowledge involved. Thus, the  
5  
6  
7 most common approaches to clinical data warehouse modelling are variations on the  
8  
9  
10 entity-attribute-value (EAV) model [24-30], where data are stored in a single table with three  
11  
12  
13 columns: entity identification, attribute, and attribute value. The EAV design has advantages,  
14  
15 including flexibility and ease of storage; however, it requires transforming EAV data into  
16  
17  
18 another analytical format before analysis [25-30]. Online analytical processing (OLAP),  
19  
20  
21 which facilitates flexible data navigation and analyses, is most frequently used for searching  
22  
23  
24 data stored in the data warehouse [16-19, 31-34]. OLAP systems in relational databases are  
25  
26  
27 typically designed based on Kimball's star or snowflake schemas [16-19, 31, 33]. However,  
28  
29  
30 the star schema was devised to facilitate online measurement analyses [16-19, 31, 33]. In  
31  
32  
33 health care, this method can be used to dynamically gather online analyses of numeric data  
34  
35  
36 (e.g., a specific dose of a drug for a specific disease or the time required for a specific  
37  
38  
39 operation) in clinical practice. It is thus not suitable for identifying patients who meet the  
40  
41  
42 complicated eligibility criteria for a given clinical research.

43  
44  
45 Current eligibility criteria are written in a text format that cannot be computationally  
46  
47  
48 processed. Several investigations have sought to establish computable eligibility criteria  
49  
50  
51 [35-42]. However, eligibility criteria are not yet completely standardised. Using natural  
52  
53  
54 language processing (NLP) technologies, converting the text format of eligibility criteria to a  
55  
56  
57 computer or extracting patient identifications from EMRs is far from perfect without human  
58  
59  
60



1  
2  
3  
4 intervention [13, 43-44].  
5  
6

7  
8 Current EMRs have been used to support claims for medical service fees and the treatments  
9  
10 administered to each patient; therefore, data gathered specifically for research purposes may  
11  
12 be incomplete and unreliable [12-13].  
13  
14

15  
16  
17 Although various investigations on each technique are executed individually, standardised  
18  
19 methods must still be established that integrate these techniques, facilitate identifying patients  
20  
21 who are eligible for clinical research, and collect necessary information from EMRs.  
22  
23  
24

## 25 26 27 **Objective** 28

29  
30  
31 To utilise EMRs efficiently in clinical research, we considered it necessary to develop an  
32  
33 EMR retrieval system (ERS) to collect data from patients who meet the eligibility criteria for  
34  
35 a study and establish practical methods to utilise the system.  
36  
37

38  
39  
40 This research aims to establish a pragmatic method optimised for patient identification and  
41  
42 collect necessary information from EMRs for clinical research. These tools are implemented  
43  
44 as an ERS. We apply the system to an actual hospital-based cohort study and conduct  
45  
46 qualitative analyses to evaluate the feasibility and usefulness of the ERS, the method to  
47  
48 convert text form eligible criteria to computable criteria, and a reconfirmation method to  
49  
50 increase research data accuracy.  
51  
52  
53  
54  
55  
56  
57  
58  
59  
60

## MATERIALS AND METHODS

### EMR retrieval system

In our hospital, EMR use was introduced in 2005; approximately 800,000 cases of clinical information have already been stored. To collect information for patients participating in clinical research comprehensively and efficiently, we developed an ERS [45].

We identified nine data categories (i.e., entities) from EMRs that are useful for clinical research: demographic characteristics, physical findings, diagnostic studies, laboratory tests, diagnoses, progress reports on an EMR template [46-50], medications and injections, operation records, and other treatments.

In designing the ERS database, we designed a new data model based on the star schema, optimised for patient identification in clinical research. Figure 1 presents our data model. In our data model, all entities in a given schema are independent and complete; this allows for logical operations and creating eligible patient lists for each respective parameter in a study [51]. The target patient list is made by combining these patient lists. The data model also supports the inference of medical concepts expressed in eligibility criteria in reference to corresponding patient data accumulated in EMRs [35].

To ensure that the data retrieval process is practical and independent of the EMR system structure, a data warehouse (i.e., data mart [52]) was created on a relational database

1  
2  
3  
4 management system by extracting, transforming, and loading information from the EMR  
5  
6  
7 system [16-23].  
8  
9

10 An OLAP tool was installed to efficiently search through data from multiple patients [16-19,  
11  
12 31-34]. The OLAP tool runs in an Internet browser and can generate structured query  
13  
14 language (SQL) based on predefined metadata (i.e., a data model) by defining logical queries  
15  
16 (i.e., programs) using a graphical user interface (GUI) [16-19, 31-34]. Moreover, it allows  
17  
18 reports on information retrieved from the browser to be transcribed using hypertext markup  
19  
20 language (HTML). The reports are created in various formats, including portable document  
21  
22 format (PDF), comma separated values (CSV), and extensible markup language (XML).  
23  
24  
25  
26  
27  
28  
29  
30

31 To protect personal information in medical records at our hospital, the EMR network is  
32  
33 separated physically from other networks. Our data warehouse and OLAP servers are  
34  
35 deployed in the same EMR network and managed using the same EMR security policies.  
36  
37  
38  
39 Additionally, using our ERS is limited only to clinical research approved by the ethics  
40  
41 committee at our hospital. Only designated staff member at our centre are allowed to retrieve  
42  
43 data. Our centre creates and manages ERS user identification separate from the EMRs. For  
44  
45 the external output of CSV and other data, permission must be obtained from our department  
46  
47 of medical informatics and data extraction must be executed in the presence of supervisors  
48  
49 who are responsible for protecting personal information at our hospital.  
50  
51  
52  
53  
54  
55  
56  
57  
58  
59  
60

## Application to clinical research

We applied the system to a hospital-based cohort study performed at our hospital, titled 'Risk of osteomyelitis of the jaw induced by oral bisphosphonates (BP) in patients taking medications for osteoporosis: a hospital-based cohort study in Japan', in which we identified eligible patients, extracted research data, and evaluated the feasibility of our system. The ethics committee at Kyoto University Hospital approved this research. A different paper details the purpose, methods, results, and discussion of this research.

This research aims to estimate the risks for osteomyelitis of the jaw in osteoporosis patients at our hospital who had been exposed to oral BP compared to those who had not [53-54].

The eligibility criteria were as follows.

### Inclusion criteria

- Patients diagnosed with osteoporosis and treated with osteoporosis medications at Kyoto University Hospital between November 2000 and October 2010.
- Patients aged 20 years or older.

### Exclusion criteria

- Patients with a history of treatment with radiation therapy to the maxillofacial region.

- Patients with primary or metastatic tumours in the maxillofacial region.
- Patients treated with intravenous BP.

The data collected were diagnosis, date of diagnosis, sex, birthday, and the doses and dates when osteoporosis medications, steroids, biopharmaceuticals in rheumatic diseases, disease modifying antirheumatic drugs, anticancer drugs, diabetes drugs and HbA1c test were administered.

### **Patient identification and data collection using our ERS**

To identify patients who meet the eligibility criteria for the clinical research in question, data were collected using the ERS in the following ways:

- 1) Convert the text form of the narrative criteria into computable criteria.
- 2) Create a targeted patient list.
- 3) Add a flag for investigators to confirm the targeted patient list.
- 4) Create reports for the investigators to confirm.

We show the details below.

### **Convert the text form of the narrative criteria to computable criteria**

To identify eligible patients and collect the necessary data from EMRs, narrative criteria and

1  
2  
3  
4 data must be converted to computable criteria. Such computable criteria include entities,  
5  
6  
7 attributes, logical operators (i.e., 'and' and 'or'), codes, and parameters [35-42]. The  
8  
9  
10 clinical research purpose and clinical practice demands made it necessary to perform this  
11  
12  
13 task.

14  
15  
16 As an example of conversion from narrative criteria to computable criteria, we present the  
17  
18  
19 following two-step conversion procedure.  
20

21  
22  
23 Step 1: Convert narrative criteria into entity-level criteria.  
24

25  
26  
27 Medical concepts expressed as narrative criteria are mapped onto entities in the data model  
28  
29  
30 and converted into entity-level criteria. For each entity, a criterion is created to extract  
31  
32  
33 patients who meet each condition. If exclusive conditions for the same entity must be defined,  
34  
35  
36 a different criterion is created. In this study, we mapped 'osteoporotic patients' onto two  
37  
38  
39 entities (i.e., 'diagnosis' and 'medications and injections') and converted it to a combination  
40  
41  
42 of two criteria (i.e., 'diagnosis of osteoporosis' and 'osteoporosis drug administration'). This  
43  
44  
45 process reflects that the test research aims to estimate some risks of osteomyelitis of the jaw  
46  
47  
48 with BP administration instead of diagnosing osteoporosis patients accurately. The recorded  
49  
50  
51 diagnosis in the EMR was typically designed to ensure payment for medical claims. We thus  
52  
53  
54 sought to reduce the number of false-positives by extracting patients with a given treatment  
55  
56  
57 type. This task was performed at the protocol development stage of the study.  
58  
59  
60

Step 2: Convert entity-level criteria into attribute-level criteria (i.e., computable criteria).

Medical concepts expressed in the entity-level criteria are mapped onto attributes in the data model; these become computable criteria by specifying the corresponding date and codes [55].

For this study, Table 1 presents a “diagnosis of osteoporosis and osteoporosis drug administration and no intravenous BP administration (i.e., exclude ‘intravenous BP administration’)”.

**Table 1.** Example of computable criteria to create the targeted patient list

| Criterion                                             | Entity                           | Operator symbol | Attribute     | Operator symbol | Parameter         | SQL                                                                                                                              |
|-------------------------------------------------------|----------------------------------|-----------------|---------------|-----------------|-------------------|----------------------------------------------------------------------------------------------------------------------------------|
| Inclusion:<br>Osteoporosis<br>diagnosis               | Diagnosis                        | -               | ICD10Code     | in              | (ICD10 code list) | Select PatientId From                                                                                                            |
|                                                       |                                  | and             | DiagnosisDate | >=              | '10/01/2000'      | Diagnosis                                                                                                                        |
|                                                       |                                  | and             | DiagnosisDate | <=              | '09/30/2010'      | Where ICD10Code in                                                                                                               |
|                                                       |                                  | and             | SuspectedFlag | =               | Fixed             | (ICD10 code list) and<br>DiagnosisDate<br>>= '10/01/2000' and<br>DiagnosisDate <=<br>'09/30/2010' and<br>SuspectedFlag = 'Fixed' |
| Inclusion:<br>Osteoporosis<br>drug<br>administrations | Medications<br>and<br>Injections | -               | DrugCode      | in              | (drug code list)  | Select PatientId From                                                                                                            |
|                                                       |                                  | and             | ExecuteDate   | >=              | '10/01/2000'      | MedicationsAndInjections                                                                                                         |
|                                                       |                                  | and             | ExecuteDate   | <=              | '09/30/2010'      | Where DrugCode in<br>(drug code list) and<br>ExecuteDate >=<br>'10/01/2000' and<br>ExecuteDate <=<br>'09/30/2010'                |
| Exclusion:<br>Intravenous BP                          | Medications<br>and               | -               | DrugCode      | in              | (drug code list)  | Select PatientId From                                                                                                            |
|                                                       |                                  | and             | ExecuteDate   | >=              | '10/01/2000'      | MedicationsAndInjections                                                                                                         |

|                 |            |     |             |    |              |                                                                                                                   |
|-----------------|------------|-----|-------------|----|--------------|-------------------------------------------------------------------------------------------------------------------|
| administrations | Injections | and | ExecuteDate | <= | '09/30/2010' | Where DrugCode in<br>(drug code list) and<br>ExecuteDate >=<br>'10/01/2000' and<br>ExecuteDate <=<br>'09/30/2010' |
|-----------------|------------|-----|-------------|----|--------------|-------------------------------------------------------------------------------------------------------------------|

BP: bisphosphonates; ICD: International Classification of Diseases; ID: identifications; SQL: structured query language.

### Creating a targeted patient list

A targeted patient list is created from the entire set of patients for whom EMRs have been obtained by defining logical queries (i.e., programs defined by the GUI) based on the computable criteria included in the ERS.

Logical queries are first defined in the ERS to identify patients who meet the conditions for each criterion. The ERS automatically generates the SQL necessary for data extraction according to the logical queries. Logical queries are then defined to include or exclude eligible patients who meet each criterion for the demographic entity. The targeted patient list is created by executing the logical query. Figure 2 presents an example of SQL automatically generated by the ERS.

We thus designed our data model to enable creating the targeted patient list by defining the patients extracted from each criterion (i.e., 'in' or 'not in') as conditions for the demographic entity that was the unique patient list for the entire hospital. If logical queries are defined



using our method, even if the eligibility criteria are complicated, it is not necessary to dramatically change the SQL structure generated in the ERS.

### Flagging entries for investigators to confirm

To improve research data accuracy, confirmation by the investigators was necessary. When confirmation is required, additional information is linked.

For the targeted patient list, logical queries are defined to flag certain items according to the investigators' interest. Necessary logical queries are first defined for each criterion. Logical queries are then defined for addition to the patient list as '1' if the data correspond or '0' if they do not. Data sets created by these operations are joined by 'union' and pivoted on a cross-tabulation list using statistical analysis software. We show an example of computable criteria that contain two criteria (i.e., 'oral BP administration' and 'diagnosis of osteomyelitis of the jaw') in Table 2 and SQL generated by the ERS in Figure 3. We also present the dataset image created by these operations in Figure 4.

**Table 2.** Example of computable criteria to be flagged for confirmation by investigators

| Criterion               | Entity      | Operator symbol | Attribute   | Operator symbol | Parameter        | SQL                                      |
|-------------------------|-------------|-----------------|-------------|-----------------|------------------|------------------------------------------|
| Oral BP administrations | Medications | -               | DrugCode    | in              | (drug code list) | Select PatientId From                    |
|                         | and         | and             | ExecuteDate | >=              | '10/01/2000'     | MedicationsAndInjections                 |
|                         | Injections  | and             | ExecuteDate | <=              | '09/30/2010'     | Where DrugCode in<br>(drug code list)and |

|                                                       |           |     |               |    |                   |                                                                                                   |
|-------------------------------------------------------|-----------|-----|---------------|----|-------------------|---------------------------------------------------------------------------------------------------|
|                                                       |           |     |               |    |                   | ExecuteDate >= '10/01/2000' and<br>ExecuteDate <= '09/30/2010'                                    |
| Diagnosis of<br>inflammatory<br>conditions of<br>jaws | Diagnosis | -   | ICD10Code     | in | (ICD10 code list) | Select PatientId From Diagnosis                                                                   |
|                                                       |           | and | DiagnosisDate | >= | '10/01/2000'      | Where ICD10Code in                                                                                |
|                                                       |           | and | DiagnosisDate | <= | '09/30/2010'      | (ICD10 code list) and                                                                             |
|                                                       |           | and | SuspectedFlag | =  | Fixed             | DiagnosisDate >= '10/01/2000' and<br>DiagnosisDate <= '09/30/2010' and<br>SuspectedFlag = 'Fixed' |

BP: bisphosphonates; ICD: International Classification of Diseases; ID: identifications; SQL:  
structured query language.

### Create reports for investigators to confirm

To help investigators confirm the targeted patient list, reports are created by linking the findings for diagnostic imaging, pathological diagnosis, operations, and others. Investigators confirm these entries using the reports and EMR information, including progress notes and images. When the diagnosis history, medication, laboratory results, progress notes, and other information are necessary, the same operation is executed for each instance. We present the dataset image generated by this operation in Figure 5. The reports may improve the investigators' confirmation efficiency, because it prevents referring to the medical records for each patient who needs confirmation.

### Systemic evaluation

To evaluate our system, we collected information about the research period using the recall method. For the accuracy of the data collected by the ERS, we evaluated the results after

1  
2  
3  
4 investigator confirmation. We also asked the investigators to evaluate the system in a  
5  
6  
7 questionnaire.  
8

## 9 10 **RESULTS**

### 11 12 13 **Computable criteria, datasets, and system evaluation**

14  
15  
16  
17  
18 We present the computable criteria in Table 3. To increase data accuracy, we collected all  
19  
20  
21 exclusion criteria for the investigators to confirm. As Table 3 shows, we extracted  
22  
23  
24 information from EMRs. For investigator confirmation, we also reported all targeted patients  
25  
26  
27 using the following lists: osteoporosis drugs administered, oral BP administered, intravenous  
28  
29  
30 BP administered, diabetes drugs administered, anticancer drugs administered,  
31  
32  
33 biopharmaceuticals in rheumatic diseases administered, disease-modifying antirheumatic  
34  
35  
36 drugs, steroid drugs administered, osteoporosis diagnoses, oral cancer diagnoses, patients  
37  
38  
39 diagnosed with inflammation of the jaw, patients diagnosed with other suspicious diseases,  
40  
41  
42 patients diagnosed with diabetes, patients diagnosed with rheumatoid arthritis, patients  
43  
44  
45 diagnosed with Sjogren's syndrome, HbA1c values, radiological findings, pathological  
46  
47  
48 findings, and radioisotope findings. These data were extracted from the ERS for statistical  
49  
50  
51 analyses, presented in CSV format, and analysed using statistics software.  
52  
53

54 **Table 3.** Computable criteria for our test research  
55  
56  
57  
58  
59  
60

| Criterion                                                         | Entity                           | Operator symbol | Attribute     | Operator symbol | Parameter                                            |
|-------------------------------------------------------------------|----------------------------------|-----------------|---------------|-----------------|------------------------------------------------------|
| Create a targeted patient list                                    |                                  |                 |               |                 |                                                      |
| Inclusion criteria:<br>Osteoporosis diagnosis                     | Diagnosis                        | -               | ICD10Code     | in              | (osteoporosis ICD10 code list)                       |
|                                                                   |                                  | and             | DiagnosisDate | >=              | '10/01/2000'                                         |
|                                                                   |                                  | and             | DiagnosisDate | <=              | '09/30/2010'                                         |
|                                                                   |                                  | and             | SuspectedFlag | =               | Fixed                                                |
| Inclusion criteria:<br>Osteoporosis drug<br>administrations       | Medications<br>and<br>Injections | -               | DrugCode      | in              | (osteoporosis drugs code list)                       |
|                                                                   |                                  | and             | ExecuteDate   | >=              | '10/01/2000'                                         |
|                                                                   | and                              | ExecuteDate     | <=            | '09/30/2010'    |                                                      |
| Add a flag for investigators to confirm the targeted patient list |                                  |                 |               |                 |                                                      |
| Exclusion criteria:<br>Oral cancer diagnosis                      | Diagnosis                        | -               | ICD10Code     | in              | (oral cancer ICD10 code list)                        |
|                                                                   |                                  | and             | DiagnosisDate | >=              | '10/01/2000'                                         |
|                                                                   |                                  | and             | DiagnosisDate | <=              | '09/30/2010'                                         |
|                                                                   |                                  | and             | SuspectedFlag | =               | Fixed                                                |
| Exclusion criteria:<br>Intravenous BP<br>administrations          | Medications<br>and<br>Injections | -               | DrugCode      | in              | (intravenous BP drugs code list)                     |
|                                                                   |                                  | and             | ExecuteDate   | >=              | '10/01/2000'                                         |
|                                                                   |                                  | and             | ExecuteDate   | <=              | '09/30/2010'                                         |
| Oral BP administrations                                           | Medications<br>and<br>Injections | -               | DrugCode      | in              | (oral BP drugs code list)                            |
|                                                                   |                                  | and             | ExecuteDate   | >=              | '10/01/2000'                                         |
|                                                                   |                                  | and             | ExecuteDate   | <=              | '09/30/2010'                                         |
| Inflammatory jaw<br>condition diagnosis                           | Diagnosis                        | -               | ICD10Code     | in              | (inflammatory conditions of jaws<br>ICD10 code list) |
|                                                                   |                                  | and             | DiagnosisDate | >=              | '10/01/2000'                                         |
|                                                                   |                                  | and             | DiagnosisDate | <=              | '09/30/2010'                                         |
|                                                                   |                                  | and             | SuspectedFlag | =               | Fixed                                                |
| Other suspicious disease<br>diagnosis                             | Diagnosis                        | -               | ICD10Code     | in              | (other suspicious disease ICD10<br>code list)        |
|                                                                   |                                  | and             | DiagnosisDate | >=              | '10/01/2000'                                         |
|                                                                   |                                  | and             | DiagnosisDate | <=              | '09/30/2010'                                         |
|                                                                   |                                  | and             | SuspectedFlag | =               | Fixed                                                |
| Rheumatoid arthritis<br>diagnosis                                 | Diagnosis                        | -               | ICD10Code     | in              | (rheumatoid arthritis ICD10 code<br>list)            |
|                                                                   |                                  | and             | DiagnosisDate | >=              | '10/01/2000'                                         |
|                                                                   |                                  | and             | DiagnosisDate | <=              | '09/30/2010'                                         |

|                                                          |                            |     |                    |          |                                                      |
|----------------------------------------------------------|----------------------------|-----|--------------------|----------|------------------------------------------------------|
|                                                          |                            | and | SuspectedFlag      | =        | Fixed                                                |
| Sjogren's syndrome diagnosis                             | Diagnosis                  | -   | ICD10Code          | in       | (sjogren's syndrome ICD10 code list)                 |
|                                                          |                            | and | DiagnosisDate      | >=       | '10/01/2000'                                         |
|                                                          |                            | and | DiagnosisDate      | <=       | '09/30/2010'                                         |
|                                                          |                            | and | SuspectedFlag      | =        | Fixed                                                |
| Diabetes diagnosis                                       | Diagnosis                  | -   | ICD10Code          | in       | (diabetes ICD10 code list)                           |
|                                                          |                            | and | DiagnosisDate      | >=       | '10/01/2000'                                         |
|                                                          |                            | and | DiagnosisDate      | <=       | '09/30/2010'                                         |
|                                                          |                            | and | SuspectedFlag      | =        | Fixed                                                |
| Steroid drug administrations                             | Medications and Injections | -   | DrugCode           | in       | (steroid drugs code list)                            |
|                                                          |                            | and | ExecuteDate        | >=       | '10/01/2000'                                         |
|                                                          |                            | and | ExecuteDate        | <=       | '09/30/2010'                                         |
| Biopharmaceuticals in rheumatic diseases administrations | Medications and Injections | -   | DrugCode           | in       | (biopharmaceuticals in rheumatic diseases code list) |
|                                                          |                            | and | ExecuteDate        | >=       | '10/01/2000'                                         |
|                                                          |                            | and | ExecuteDate        | <=       | '09/30/2010'                                         |
| Disease-modifying antirheumatic drug administrations     | Medications and Injections | -   | DrugCode           | in       | (disease modifying antirheumatic drugs code list)    |
|                                                          |                            | and | ExecuteDate        | >=       | '10/01/2000'                                         |
|                                                          |                            | and | ExecuteDate        | <=       | '09/30/2010'                                         |
| Anticancer drug administrations                          | Medications and Injections | -   | DrugCode           | in       | (anticancer drugs code list)                         |
|                                                          |                            | and | ExecuteDate        | >=       | '10/01/2000'                                         |
|                                                          |                            | and | ExecuteDate        | <=       | '09/30/2010'                                         |
| Diabetes drug administrations                            | Medications and Injections | -   | DrugCode           | in       | (diabetes drugs code list)                           |
|                                                          |                            | and | ExecuteDate        | >=       | '10/01/2000'                                         |
|                                                          |                            | and | ExecuteDate        | <=       | '09/30/2010'                                         |
| HbA1c test execution                                     | Laboratory Test            | -   | LaboratoryTestCode | in       | (HbA1c test code)                                    |
|                                                          |                            | and | TestDate           | >=       | '10/01/2000'                                         |
|                                                          |                            | and | TestDate           | <=       | '09/30/2010'                                         |
| Create reports for confirmation by the investigators     |                            |     |                    |          |                                                      |
| Radiological finding reports                             | Diagnostic Studies         | -   | ReportName         | in       | (report name list of oral region)                    |
| Pathologic finding reports                               | Diagnostic Studies         | -   | SampleName         | contains | 'bone'                                               |
|                                                          |                            | or  | SampleName         | contains | 'jaw'                                                |

|                               |                    |   |   |   |   |
|-------------------------------|--------------------|---|---|---|---|
| Radio isotope finding reports | Diagnostic Studies | - | - | - | - |
|-------------------------------|--------------------|---|---|---|---|

BP: bisphosphonates; ICD: International Classification of Diseases; ID: identifications

Among the approximately 800,000 cases at our hospital, 8,772 were categorised using the terms 'Inclusion criteria: Osteoporosis diagnosis'; among this group, 7,195 were further categorised using 'Inclusion criteria: Osteoporosis drug administration'. We then calculated the time that had elapsed since the osteoporosis diagnosis, determined that 7,062 patients were aged 20 years or older and created a targeted patient list. Among those on the targeted patient list, 23 were placed under the heading 'Exclusion criteria: Oral cancer diagnosis', 110 under 'Exclusion criteria: Intravenous BP administration', 4,200 under 'Oral BP administration', 84 under 'Inflammatory jaw condition diagnosis', 2,064 as 'Other suspicious disease diagnosis', 1,176 as 'Rheumatoid arthritis diagnosis', 394 as 'Sjogren's syndrome diagnosis', 1,700 as 'Diabetes diagnosis', 4,551 as 'Steroid drug administration', 186 as 'Biopharmaceuticals in rheumatic diseases administrations', 1,279 as 'Disease-modifying antirheumatic drug administrations', 904 as 'Anticancer drug administrations', 1,055 as 'Diabetes drug administrations', and 3,641 as 'HbA1c test execution'. Because of the end point considered, patients who were classified under 'Inflammatory jaw condition diagnosis' or 'Other suspicious disease diagnosis' were confirmed by investigators, who performed the statistical analyses and arranged the research results.

1  
2  
3  
4 The accuracy of the data extracted by the ERS was characterised as follows. Reviewing the  
5  
6  
7 medical records revealed that 2,817 patients were not labelled as 'Oral BP administration',  
8  
9  
10 including seven (one who received intravenous BP) treated at other hospitals. Six patients had  
11  
12  
13 been treated with radiation therapy to the oral and maxillofacial regions. Among 72 classified  
14  
15  
16 under 'Inflammatory jaw condition diagnosis', 35 cases and 37 non-cases were identified.

17  
18  
19 We present the timeline required for the test research. The data extraction period lasted  
20  
21  
22 approximately three months. Ten meetings were held to create and validate the computable  
23  
24  
25 criteria and the list of codes for various drugs and diagnoses (i.e., International Statistical  
26  
27  
28 Classification of Diseases (ICD)-10 [56]). The time required for logical query definition  
29  
30  
31 when using the ERS was approximately 20 hours. The investigator confirmations and  
32  
33  
34 statistical analyses took approximately four months.

35  
36  
37 The investigators evaluating the system mentioned that 1) it enabled them to extract the  
38  
39  
40 necessary data for diagnosis and drug administration without exception; 2) by screening the  
41  
42  
43 entire patient population at the hospital using the ERS, they could identify not only eligible  
44  
45  
46 patients in the department of oral and maxillofacial surgery but also all eligible patients,  
47  
48  
49 which reduced the study bias; and 3) by creating reports for confirmation, it enabled  
50  
51  
52 investigators to devote their time to reading images, thus effectively reducing the time  
53  
54  
55 required for reviewing medical records.  
56  
57  
58  
59  
60

## DISCUSSION

We identified eligible patients for this research and extracted the data necessary for confirmation by investigators and statistical analyses. Using the ERS allowed the collection of information on patient eligibility by efficiently combining clinical information. Our proposed method also reduced the labour required from investigators, indicating that it was useful.

To design the ERS database, we modified the star schema and designed a new data model optimised for patient identification. To compare our data model with the star schema, we present an example of a clinical data model designed based on the star schema [34] in Figure 6. The main differences between our data model and the star schema were 1) demographic data, which were presented in list form in our EMR system, were presented as a fact-less fact table, and 2) date and time, measurements (i.e., facts) and text information were presented in dimension tables [43]. The most significant characteristic of our method for patient identification is using a specialised data model for patient identification in clinical research. Data can be converted efficiently without being conscious of the EMR database structure when converting narrative criteria to computable criteria. In this research, we considered whether data were extracted directly from EMRs at the protocol development stage. However, EMR data were recorded in a sequential format for every medical practice, and the database structure was complicated. Comprehending the location and meaning of the necessary data



1  
2  
3  
4 thus required tremendous effort. It was difficult to make precise logical queries for patient  
5  
6  
7 identification. However, because our ERS data model was arranged by subjects (e.g., tests,  
8  
9  
10 diagnosis, or medications), it was easy to interpret the available information. Due to the  
11  
12  
13 standardisation of computable criteria and SQL possible with the ERS, it was also possible to  
14  
15  
16 create computable criteria in little time. Additionally, verifying the patient identification  
17  
18  
19 accuracy was easy because it was possible to test each individual criterion.

20  
21  
22 The SQL generated by our ERS does not reduce the time required for data retrieval. Our ERS  
23  
24  
25 also cannot retrieve information that is not in the data model. It is thus necessary to create  
26  
27  
28 eligibility criteria assuming the use of our ERS from the protocol development stage. Current  
29  
30  
31 EMRs do not store all necessary data for clinical research, including information related to  
32  
33  
34 pregnancy, performance status, cancer stage, availability of transportation to the hospital,  
35  
36  
37 specific tests that are not typically performed, drug regimen, outcomes including death, and  
38  
39  
40 adverse events. Additionally, all tests are not administered to all patients, and necessary  
41  
42  
43 information may have been recorded in medical records at another hospital [12-13]. To  
44  
45  
46 facilitate EMR use in clinical research, it is necessary to accumulate as much of this  
47  
48  
49 information as possible. In the hospital, much information does not integrate well with EMRs,  
50  
51  
52 including test reports stored only in the departmental system and departmental research  
53  
54  
55 databases [57]. It is important to utilise this information. Additionally, enabling ERS use in  
56  
57  
58 multiple institutions is also an important future task.  
59  
60

1  
2  
3  
4 Our conversion method depends on high-level medical decisions by investigators. Some  
5  
6  
7 medical concepts may be interpreted differently depending on the research and the  
8  
9  
10 investigator caring for the patients. It is necessary both to change the tacit knowledge of the  
11  
12  
13 investigators about converting computable criteria to explicit knowledge and to standardise  
14  
15  
16 this knowledge [58-63]. To reduce criteria conversion and investigator confirmation, it may  
17  
18  
19 be useful to apply NLP or decision support technology in combination with our system.  
20  
21  
22 Moreover, it is important to further discuss computable eligibility criteria standardisation.  
23  
24  
25 The attribute-level criteria that describe the search conditions in detail may be useful in  
26  
27  
28 global studies that address diseases that vary according to the diagnostic criteria used in each  
29  
30  
31 country.

32  
33  
34 Concerning EMR data accuracy, the ICD10 code (osteomyelitis of the jaw) sensitivity was  
35  
36  
37 48.6% (35/72). The investigators reported six simple diagnosis errors, seven oral BP  
38  
39  
40 administrations at other hospitals, and six patients who were treated with radiation therapy in  
41  
42  
43 the oral and maxillofacial region. For the accuracy of current EMRs, the investigators had to  
44  
45  
46 confirm the information. However, the EMRs provided rich confirmation data and were  
47  
48  
49 useful in improving research data accuracy. In this study, we checked the data from actual  
50  
51  
52 EMRs manually and identified patients precisely and extensively using coded information,  
53  
54  
55 narrative information, and images. However, only information from existing EMRs was  
56  
57  
58 available. Current EMRs have a high degree of flexibility in data entry and are not currently  
59  
60

1  
2  
3  
4 managed for research purposes, which decreases their reliability [12-13]. It is necessary to  
5  
6  
7 improve data quality through quality control without placing too much of a burden on clinical  
8  
9  
10 practice. Alternatively, it may be possible to organise data sufficiently before research use  
11  
12 [64-66]. Standardising terminology and exchange formats characteristic of healthcare has  
13  
14 facilitated international discourse [56, 67-73]. It is necessary to further discuss not only  
15  
16 clinical practice but also research purposes, particularly how to utilise such various standards  
17  
18 when using EMRs beyond the hospital setting.  
19  
20  
21  
22  
23

## 24 25 **CONCLUSION**

26  
27  
28 We proposed a pragmatic method for EMR-based observational studies. Our ERS is already  
29  
30 used to support hospital-based cohort studies, clinical trial recruitment, and the eClinical trial  
31  
32 infrastructure [45] at our centre. We believe an efficient ERS is essential to facilitate clinical  
33  
34 research that utilises EMRs.  
35  
36  
37  
38  
39

## 40 41 **Acknowledgements**

42  
43  
44  
45 The authors would like to acknowledge the staff of the Department of Medical Informatics of  
46  
47  
48 Kyoto University Hospital for their generous support.  
49  
50

## 51 52 **Funding**

53  
54  
55  
56 This work was supported by Coordination, Support and Training Program for Translational  
57  
58  
59  
60

1  
2  
3  
4 Research of Ministry of Education, Culture, Sports, Science and Technology of Japan and  
5  
6  
7 Grants-in-Aid for Scientific Research of Japan (23790566).  
8  
9

### 10 **Competing interests**

11  
12  
13  
14 None.  
15  
16

### 17 **Contributors**

18  
19  
20  
21  
22 KY designed the study, developed the ERS system, identified the computable eligibility  
23  
24 criteria, wrote logical queries, collected data, and wrote the manuscript. ES is grant holder,  
25  
26  
27 designed the study, developed the ERS system, and wrote and edited the manuscript. TY  
28  
29  
30 designed and conducted the 'Risk of osteomyelitis of the jaw induced by oral  
31  
32 bisphosphonates in patients taking medications for osteoporosis: a hospital-based cohort  
33  
34 study in Japan' (BRONJ study) study and this study, identified the computable eligibility  
35  
36  
37 criteria, and wrote and edited the manuscript. KA and MY designed and conducted the  
38  
39  
40 BRONJ study. ST is designed the study and provided comments and feedback on the study.  
41  
42  
43  
44 KB is the principal investigator of the BRONJ study. MY is the owner of the ERS system and  
45  
46  
47 supervised the study. MF supervised the study and provided comments and feedback on the  
48  
49  
50 study. All of the authors read and approved the final manuscript.  
51  
52  
53  
54

### 55 **Provenance and peer review**

1  
2  
3  
4 Not commissioned; externally peer reviewed.  
5  
6

7  
8 **Data sharing statement**  
9

10  
11 No other data are available to share.  
12  
13  
14  
15  
16  
17  
18  
19  
20  
21  
22  
23  
24  
25  
26  
27  
28  
29  
30  
31  
32  
33  
34  
35  
36  
37  
38  
39  
40  
41  
42  
43  
44  
45  
46  
47  
48  
49  
50  
51  
52  
53  
54  
55  
56  
57  
58  
59  
60

For peer review only

**REFERENCES**

1. Dean BB, Lam J, Natoli JL, et al. Review: Use of electronic medical records for health outcomes research: A literature review. *Med Care Res Rev* 2009;**66**(6):611-38.
2. Tannen RL, Weiner MG, Marcus SM. Simulation of the Syst-Eur randomized control trial using a primary care electronic medical record was feasible. *J Clin Epidemiol* 2006;**59**(3):254-64.
3. Williams JG, Cheung WY, Cohen DR. Can randomised trials rely on existing electronic data? A feasibility study to explore the value of routine data in health technology assessment. *Health Technol Assess* 2003;**7**(26): iii, v-x, 1-117.
4. Yamamoto K, Matsumoto S, Tada H, et al. A data capture system for outcomes studies that integrates with electronic health records: development and potential uses. *J Med Syst* 2008;**32**(5):423-7.
5. Yamamoto K, Matsumoto S, Yanagihara K, et al. A data-capture system for post-marketing surveillance of drugs that integrates with hospital electronic health records. *Open Access J Clin Trials* 2011;**3**:21-6.
6. Embi PJ, Jain A, Clark J, et al. Effect of a clinical trial alert system on physician participation in trial recruitment. *Arch Intern Med* 2005;**165**(19):2272-7.

- 1  
2  
3  
4 7. Campbell MK, Snowdon C, Francis D, et al. Recruitment to randomised trials: strategies  
5  
6 for trial enrollment and participation study. The STEPS study. *Health Technol Assess*  
7  
8 2007;**11**:iii, ix-105.  
9
- 10  
11  
12  
13 8. Dugas M, Lange M, Müller-Tidow C, et al. Routine data from hospital information  
14  
15 systems can support patient recruitment for clinical studies. *Clin Trials* 2010;**7**(2):183-9.  
16  
17
- 18  
19  
20 9. Thadani SR, Weng C, Bigger JT, et al. Electronic screening improves efficiency in clinical  
21  
22 trial recruitment. *J Am Med Inform Assoc* 2009;**16**(6):869-73.  
23  
24
- 25  
26  
27 10. Torgerson JS, Arlinger K, Käppi M, et al. Principles for enhanced recruitment of subjects  
28  
29 in a large clinical trial: The XENDOS study experience. *Control Clin Trials*  
30  
31 2001;**22**(5):515-25.  
32  
33
- 34  
35  
36 11. Embi PJ, Payne PR. Clinical research informatics: challenges, opportunities and  
37  
38 definition for an emerging domain. *J Am Med Inform Assoc.* 2009;**16**(3):316-27  
39  
40
- 41  
42  
43 12. Prokosch HU, Ganslandt T. Perspectives for medical informatics. Reusing the electronic  
44  
45 medical record for clinical research. *Methods Inf Med.* 2009;**48**(1):38-44.  
46  
47
- 48  
49  
50 13. Wasserman RC. Electronic medical records (EMRs), epidemiology, and epistemology:  
51  
52 reflections on EMRs and future pediatric clinical research. *Acad Pediatr.* 2011;**11**(4):280-7.  
53  
54
- 55  
56  
57 14. Daniels K, R. *eClinical Trials: Planning and Implementation.* Boston, MA:  
58  
59  
60

1  
2  
3  
4 CenterWatch, 2003.  
5  
6

7  
8 15. Kristianson KJ, Ljunggren H, Gustafsson LL. Data extraction from a semi-structured  
9  
10 electronic medical record system for outpatients: a model to facilitate the access and use of  
11  
12 data for quality control and research. *Health Inform J* 2009;**15**(4):305–319.  
13  
14

15  
16  
17 16. Inmon WH. *Building the Data Warehouse*, Wiley 2005.  
18

19  
20  
21 17. Shim JP. Past, present, and future of decision support technology. *Decis Support Syst*  
22  
23 2002;**33**(2):111-26.  
24  
25

26  
27  
28 18. Prat N. A UML-based data warehouse design method. *Decis Support Syst*  
29  
30 2006;**42**(3):1449-73.  
31  
32

33  
34  
35 19. Park YT. An empirical investigation of the effects of data warehousing on decision  
36  
37 performance. *Inform Manag* 2006;**43**(1):51.  
38  
39

40  
41 20. Schlaps D, Schmid T. Data warehousing in clinical research and development - From  
42  
43 clinical data to knowledge portals. *Pharmind* 2004;**66**(5a):637-46.  
44  
45

46  
47  
48 21. Grant A, Moshyk A, Diab H, et al. Integrating feedback from a clinical data warehouse  
49  
50 into practice organisation. *Int J Med Inform* 2006;**75**(3-4):232-9.  
51  
52

53  
54  
55 22. Junttila K, Meretoja R, Seppälä A, et al. Data warehouse approach to nursing  
56  
57 management. *J Nurs Manag* 2007;**15**(2):155-61.  
58  
59  
60



- 1  
2  
3  
4 23. Rubin DL, Desser TS. A data warehouse for integrating radiologic and pathologic data. J  
5  
6  
7 Am Coll Radiol 2008;**5**(3):210-7.  
8  
9  
10  
11 24. Johnson SB. Generic data modeling for clinical repositories. J Am Med Inform Assoc  
12  
13 1996;**3**(5):328-39.  
14  
15  
16  
17 25. Nadkarni PM, Brandt C. Data extraction and ad hoc query of an entity—attribute—value  
18  
19 database. J Am Med Inform Assoc 1998;**5**:511-27.  
20  
21  
22  
23  
24 26. Anhøj J. Generic design of Web-based clinical databases. J Med Internet Res  
25  
26 2003;**5**(4):e27.  
27  
28  
29  
30  
31 27. Chen RS, Nadkarni P, Marenco L, et al. Exploring performance issues for a clinical  
32  
33 database organized using an entity-attribute-value representation. J Am Med Inform Assoc  
34  
35 2000;**7**:475-87.  
36  
37  
38  
39  
40 28. Dinu V, Nadkarni P. Guidelines for the effective use of entity-attribute-value modeling for  
41  
42 biomedical databases. Int J Med Inform 2007;**76**:769-79.  
43  
44  
45  
46  
47 29. Corwin J, Silberschatz A, Miller PL, et al. Dynamic tables: an architecture for managing  
48  
49 evolving, heterogeneous biomedical data in relational database management systems. J Am  
50  
51 Med Inform Assoc 2007;**14**:86-93.  
52  
53  
54  
55  
56  
57 30. Wade TD, Hum RC, Murphy JR. A dimensional bus model for integrating clinical and  
58  
59  
60

1  
2  
3  
4 research data. *J Am Med Inform Assoc* 2011;**1**:96-102.

5  
6  
7  
8 31. Pardillo J, Mazón JN. Model-driven development of OLAP metadata for relational data  
9  
10 warehouses. *Comput Stand Interfac* 2012;**34**(1):189-202.

11  
12  
13  
14 32. Hettler M. Data mining goes multidimensional. *Healthc Inform.* 1997;**14**(3):43-6, 48, 51-6.

15  
16  
17  
18 33. Gordon BD, Asplin BR. Using online analytical processing to manage emergency  
19  
20 department operations. *Acad Emerg Med* 2004;**11**(11):1206-12.

21  
22  
23  
24 34. Kimball R, Reeves L, Ross M, et al. *The Data Warehouse Lifecycle Toolkit*. New  
25  
26  
27  
28  
29 York: John Wiley, 1998.

30  
31  
32  
33 35. Weng C, Tu SW, Sim I, et al. Formal representation of eligibility criteria: A literature  
34  
35  
36 review. *J Biomed Inform* 2010;**43**(3):451-67.

37  
38  
39  
40 36. Lonsdale DW, Tustison C, Parker CG, et al. Assessing clinical trial eligibility with logic  
41  
42  
43 expression queries. *Data Knowl Eng* 2008;**66**(1):3-17.

44  
45  
46  
47 37. Tu SW, Peleg M, Carini S, et al. A practical method for transforming free-text eligibility  
48  
49  
50 criteria into computable criteria. *J Biomed Inform* 2011;**44**(2):239-50.

51  
52  
53  
54 38. Sordo M, Boxwala AA, Ogunyemi O, et al. Description and status update on GELLO: a  
55  
56  
57  
58  
59  
60 proposed standardized object-oriented expression language for clinical decision support. *Stud*

1  
2  
3  
4 Health Technol Inform. 2004;**107**:164-8.  
5  
6

7  
8 39. Séroussi B, Bouaud J. Using OncoDoc as a computer-based eligibility screening system  
9  
10 to improve accrual onto breast cancer clinical trials. Artif Intell Med 2003;**29**(1-2):153-67.  
11  
12

13  
14 40. CDISC ASPIRE: Integration of clinical research and EHR: Eligibility coding standards.  
15  
16

17 [http://crisummit2010.amia.org/files/symposium2008/S14\\_Niland.pdf](http://crisummit2010.amia.org/files/symposium2008/S14_Niland.pdf) (accessed 31 Mar  
18  
19 2012).  
20  
21

22  
23  
24 41. CDISC Study Design Model: SDM-XML Version 1.0.  
25  
26

27 [http://www.cdisc.org/stuff/contentmgr/files/0/8c85b168e80d6834ded59339b55fdb7/misc/cd  
28  
29  
30  
31  
32  
33  
34  
35  
36  
37  
38  
39  
40  
41  
42  
43  
44  
45  
46  
47  
48  
49  
50  
51  
52  
53  
54  
55  
56  
57  
58  
59  
60](http://www.cdisc.org/stuff/contentmgr/files/0/8c85b168e80d6834ded59339b55fdb7/misc/cdisc_sdm_xml_1.0.pdf)  
[isc\\_sdm\\_xml\\_1.0.pdf](http://www.cdisc.org/stuff/contentmgr/files/0/8c85b168e80d6834ded59339b55fdb7/misc/cdisc_sdm_xml_1.0.pdf) (accessed 31 Mar 2012).

42. US. National Cancer Institute (NCI). caMATCH.

<https://cabig.nci.nih.gov/community/tools/caMATCH> (accessed 31 Mar 2012).

43. Jagannathan V, Mullett CJ, Arbogast JG, et al. Assessment of commercial NLP engines for medication information extraction from dictated clinical notes. Int J Med Inform 2009;**78**(4):284-91.

44. Pakhomov S, Weston SA, Jacobsen SJ, et al. Electronic medical records for clinical research: application to the identification of heart failure. Am J Manag Care 2007;**13**(6):281-8.

- 1  
2  
3  
4 45. Yamamoto K, Yamanaka K, Hatano E, et al. An eClinical trial system for cancer that  
5  
6 integrates with clinical pathways and electronic medical records. Clin trials (In press accepted  
7  
8 27-Mar-2012) .  
9  
10  
11  
12  
13 46. Matsumura Y, Kuwata S, Yamamoto Y, et al. Template-based data entry for general  
14  
15 description in medical records and data transfer to data warehouse for analysis. Stud Health  
16  
17 Technol Inform 2007;**129**(Pt 1):412–416.  
18  
19  
20  
21  
22  
23 47. Henry SB, Douglas K, Galzagorry G, et al. A template-based approach to support  
24  
25 utilization of clinical practice guidelines within an electronic health record. J Am Med Inform  
26  
27 Assoc. 1998;**5**(3):237-44.  
28  
29  
30  
31  
32  
33 48. Los RK, van Ginneken AM, van der Lei J. OpenSDE: a strategy for expressive and  
34  
35 flexible structured data entry. Int J Med Inform. 2005;**74**(6):481-90.  
36  
37  
38  
39  
40 49. Rose EA, Deshikachar AM, Schwartz KL, et al. Use of a template to improve  
41  
42 documentation and coding. Fam Med. 2001;**33**(7):516-21.  
43  
44  
45  
46 50. Chen R, Enberg G, Klein GO. Julius--a template based supplementary electronic health  
47  
48 record system. BMC Med Inform Decis Mak. 2007 **2**;7:10.  
49  
50  
51  
52  
53 51. C.J.Date. An Introduction to Database Systems 8<sup>th</sup> ed. Boston; Addison Wesley. 2003  
54  
55  
56  
57 52. W. H. Inmon, Claudia Imhoff, Ryan Sousa. Corporate Information Factory. Hoboken,  
58  
59  
60

1  
2  
3  
4 New Jersey, John Wiley & Sons 2ed; 2000  
5  
6

7  
8 53. Fellows JL, Rindal DB, Barasch A, et al. ONJ in two dental practice-based research  
9  
10 network regions. J Dent Res 2011;**90**(4):433-8.  
11

12  
13  
14 54. Vestergaard P, Schwartz K, Rejnmark L, et al. Oral bisphosphonate use increases the risk  
15  
16 for inflammatory jaw disease: a cohort study. J Oral Maxillofac Surg. [Published Online First  
17  
18 2011 Jul 15].  
19

20  
21  
22 55. Pathak J, Wang J, Kashyap S, et al. Mapping clinical phenotype data elements to  
23  
24 standardized metadata repositories and controlled terminologies: the eMERGE Network  
25  
26 experience. J Am Med Inform Assoc. 2011;**18**(4):376-86.  
27  
28

29  
30  
31 56. World Health Organization (WHO). International Classification of Diseases (ICD).  
32  
33

34  
35  
36 <http://www.who.int/classifications/icd/en/> (accessed 31 Mar 2012).  
37  
38

39  
40 57. Shortliffe EH, Cimino JJ. Biomedical Informatics: Computer Applications in Health Care  
41  
42 and Biomedicine. Health Informatics series. Springer, 2006.  
43  
44

45  
46  
47 58. Carrier A, Levasseur M, Bédard D, et al. Community occupational therapists' clinical  
48  
49 reasoning: identifying tacit knowledge. Aust Occup Ther J 2010;**57**(6):356-65.  
50  
51

52  
53  
54 59. Thornton T. Clinical judgement, expertise and skilled coping. J Eval Clin Pract  
55  
56 2010;**16**(2):284-91.  
57  
58  
59  
60

- 1  
2  
3  
4 60. Loughlin M. Epistemology, biology and mysticism: comments on 'Polanyi's tacit  
5  
6  
7 knowledge and the relevance of epistemology to clinical medicine'. J Eval Clin Pract  
8  
9  
10 2010;**16**(2):298-300.  
11  
12  
13 61. Kienle GS, Kiene H. Clinical judgement and the medical profession. J Eval Clin Pract  
14  
15  
16 2011;**17**(4):621-7.  
17  
18  
19  
20 62. Ting SL. Knowledge elicitation approach in enhancing tacit knowledge sharing. Ind  
21  
22  
23 Manag Data Syst 2011;**111**(7):1039-64.  
24  
25  
26  
27 63. Fugill M. Tacit knowledge in dental clinical teaching. Eur J Dent Educ 2012;**16**(1):2-5.  
28  
29  
30  
31 64. McFadden E. Management of data in clinical trials. 2nd ed. Hoboken, NJ:  
32  
33  
34 Wiley-Interscience, 2007.  
35  
36  
37  
38 65. Zhengwu L, Jing S. Clinical data management: current status, challenges, and future  
39  
40  
41 directions from industry perspectives. Open Access J Clin Trials 2010;**2**: 93–105.  
42  
43  
44  
45 66. Data Management Association (DAMA) International. Data management body of  
46  
47  
48 knowledge. <http://www.dama.org/i4a/pages/index.cfm?pageid=3364> (accessed 31 Mar 2012).  
49  
50  
51  
52 67. MedDRA MSSO. MedDRA MSSO. <http://www.meddramsso.com/> (accessed 31 Mar  
53  
54  
55 2012).  
56  
57  
58 68. US National Library of Medicine. SNOMED clinical terms,  
59  
60

1  
2  
3  
4 [http://www.nlm.nih.gov/research/umls/Snomed/snomed\\_main.html](http://www.nlm.nih.gov/research/umls/Snomed/snomed_main.html) (accessed 31 Mar 2012).  
5  
6

7  
8 69. Clinical Data Interchange Standards Consortium (CDISC). Clinical data acquisition  
9  
10 standards harmonization (CDASH). <http://www.cdisc.org/cdash> (accessed 31 Mar 2012).  
11  
12

13  
14 70. Clinical Data Interchange Standards Consortium (CDISC). Study data tabulation model  
15  
16 (SDTM). <http://www.cdisc.org/sdtm> (accessed 31 Mar 2012).  
17  
18

19  
20  
21 71. Huff S. Development of the logical observation identifier names and codes (LOINC)  
22  
23 vocabulary. J Am Med Inform Assoc 1998;5(3):276-92.  
24  
25

26  
27  
28 72. Health level seven (HL7). <http://www.hl7.com/> (accessed 31 Mar 2012).  
29  
30

31  
32 73. Integrating the healthcare enterprise (IHE). <http://www.ihe.net/> (accessed 31 Mar 2012).  
33  
34  
35  
36  
37  
38  
39  
40  
41  
42  
43  
44  
45  
46  
47  
48  
49  
50  
51  
52  
53  
54  
55  
56  
57  
58  
59  
60

## FIGURE CAPTIONS

**Figure 1.** Data model for our EMR retrieval system.

**Figure 2.** Example SQL to create the target patient list.

**Figure 3.** Example SQL to flag the target patient report for investigator confirmation.

**Figure 4.** Sample data were flagged on the target patient report for investigator confirmation.

The left table is extracted from logical queries, which were defined to add patients as '1' on the list if a correspondence was observed or as '0' if no correspondence was observed. The table was pivoted on a cross-tabulation list using statistical software.

**Figure 5.** Dataset image set aside for investigator confirmation. This is a sample of the list of radiological findings.

**Figure 6.** Example of a star schema for clinical information.



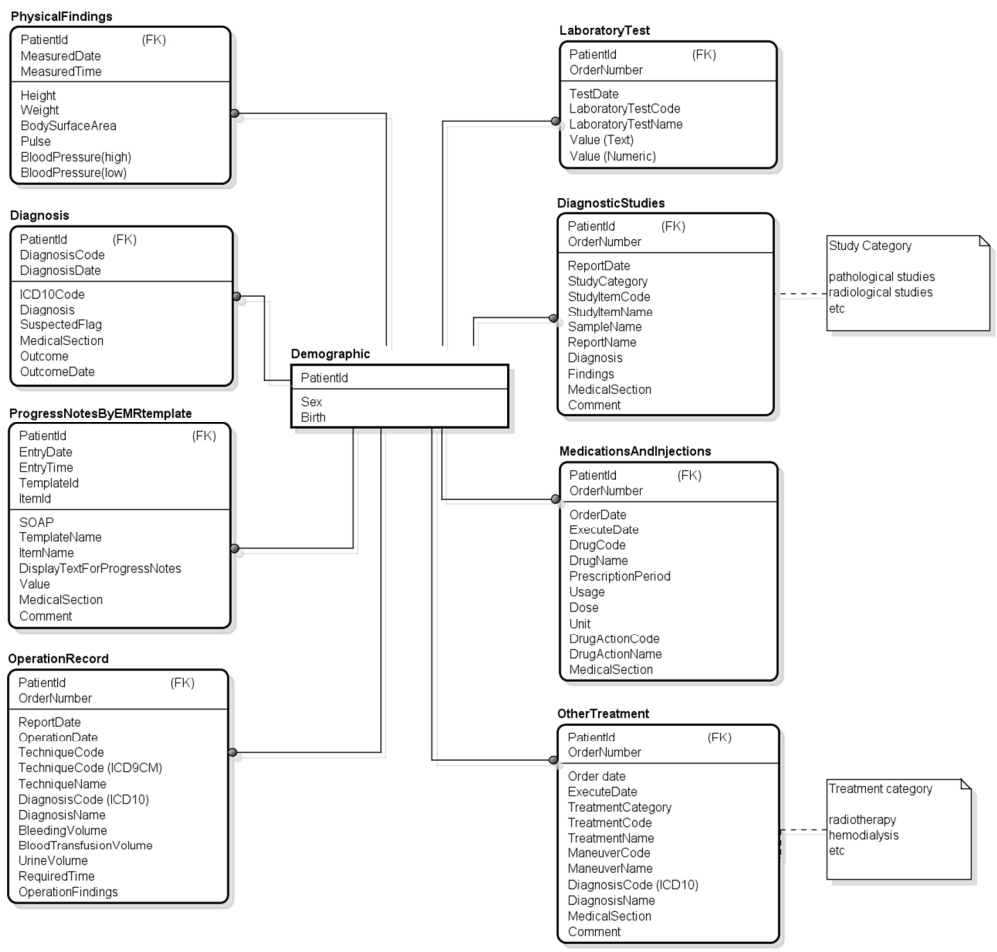

Figure 1. Data model for our EMR retrieval system.  
109x104mm (300 x 300 DPI)

only

1  
2  
3  
4  
5  
6  
7  
8  
9  
10  
11  
12  
13  
14  
15  
16  
17  
18  
19  
20  
21  
22  
23  
24  
25  
26  
27  
28  
29  
30  
31  
32  
33  
34  
35  
36  
37  
38  
39  
40  
41  
42  
43  
44  
45  
46  
47  
48  
49  
50  
51  
52  
53  
54  
55  
56  
57  
58  
59  
60

1  
2  
3  
4  
5  
6  
7  
8 Create View\_PatientsList as  
9 Select PatientId From Demographic

10 Where

11 a. PatientId in (

12 Select PatientId From Diagnosis  
13 Where ICD10Code in (osteoporosis ICD10 code list) and  
14 DiagnosisDate >= '10/01/2000' and DiagnosisDate <= '09/30/2010' and  
15 SuspectedFlag = 'Fixed' )  
16

17 and

18 a. PatientId in (

19 Select PatientId From MedicationsAndInjections  
20 Where DrugCode in (osteoporosis drugs code list) and  
21 ExecuteDate >= '10/01/2000' and ExecuteDate <= '09/30/2010' )  
22

23 and

24 a. PatientId not in (

25 Select PatientId From MedicationsAndInjections  
26 Where DrugCode in (intravenous BP drug code list) and  
27 ExecuteDate >= '10/01/2000' and ExecuteDate <= '09/30/2010' )  
28  
29  
30

31  
32 Figure 2. Example SQL to create the target patient list.  
33 81x60mm (300 x 300 DPI)  
34  
35  
36  
37  
38  
39  
40  
41  
42  
43  
44  
45  
46  
47  
48  
49  
50  
51  
52  
53  
54  
55  
56  
57  
58  
59  
60

```

Select PatientId, Oral BP administrations, 1 From View_PatientsList a
Where a. PatientId in (
    Select PatientId From MedicationsAndInjections
    Where DrugCode in (oral BP drugs code list) and
    ExecuteDate >= '10/01/2000' and ExecuteDate <= '09/30/2010 ' )
Union all
Select PatientId, Oral BP administrations, 0 From View_PatientsList a
Where a. PatientId not in (
    Select PatientId From MedicationsAndInjections
    Where DrugCode in (oral BP drugs code list) and
    ExecuteDate >= '10/01/2000' and ExecuteDate <= '09/30/2010')
Union all
Select PatientId, Inflammatory jaw condition diagnosis, 1 From View_PatientsList a
Where a. PatientId in (
    Select PatientId From Diagnosis
    Where ICD10Code in (inflammatory conditions of jaws ICD10 code list) and
    DiagnosisDate >= '10/01/2000' and DiagnosisDate <= '09/30/2010' and SuspectedFlag = 'Fixed')
Union all
Select PatientId, Inflammatory jaw condition diagnosis, 0 From View_PatientsList a
Where a. PatientId not in (
    Select PatientId From Diagnosis
    Where ICD10Code in (inflammatory conditions of jaws ICD10 code list) and
    DiagnosisDate >= '10/01/2000' and DiagnosisDate <= '09/30/2010' and SuspectedFlag = 'Fixed')
    
```

Figure 3. Example SQL to flag the target patient report for investigator confirmation.  
81x60mm (300 x 300 DPI)

Review only

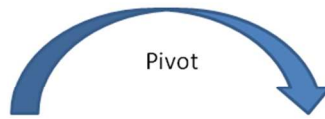

| Patient Id | Criteria                             | Value |
|------------|--------------------------------------|-------|
| 1          | Oral BP administrations              | 0     |
| 1          | Inflammatory jaw condition diagnosis | 0     |
| 2          | Oral BP administrations              | 1     |
| 2          | Inflammatory jaw condition diagnosis | 1     |
| 3          | Oral BP administrations              | 0     |
| 3          | Inflammatory jaw condition diagnosis | 0     |
| 4          | Oral BP administrations              | 1     |
| 4          | Inflammatory jaw condition diagnosis | 0     |
| 5          | Oral BP administrations              | 0     |
| 5          | Inflammatory jaw condition diagnosis | 1     |
| 6          | Oral BP administrations              | 0     |
| 6          | Inflammatory jaw condition diagnosis | 1     |
| 7          | Oral BP administrations              | 0     |
| 7          | Inflammatory jaw condition diagnosis | 0     |
| 8          | Oral BP administrations              | 1     |
| 8          | Inflammatory jaw condition diagnosis | 1     |

| Patient Id | Oral BP administrations | Inflammatory jaw condition diagnosis |
|------------|-------------------------|--------------------------------------|
| 1          | 0                       | 0                                    |
| 2          | 1                       | 1                                    |
| 3          | 0                       | 0                                    |
| 4          | 1                       | 0                                    |
| 5          | 0                       | 1                                    |
| 6          | 0                       | 1                                    |
| 7          | 0                       | 0                                    |
| 8          | 1                       | 1                                    |

Figure 4. Sample data were flagged on the target patient report for investigator confirmation. The left table is extracted from logical queries, which were defined to add patients as '1' on the list if a correspondence was observed or as '0' if no correspondence was observed. The table was pivoted on a cross-tabulation list using statistical software.  
79x41mm (300 x 300 DPI)

| 患者ID     | オーダー種類(名称) | レポート名称   | 診断                                                                                    | 所見                                                                                                                                                                                                                                                                                                                       | 報告日        | 依頼コメント               |
|----------|------------|----------|---------------------------------------------------------------------------------------|--------------------------------------------------------------------------------------------------------------------------------------------------------------------------------------------------------------------------------------------------------------------------------------------------------------------------|------------|----------------------|
| 00000010 | 放射線        | 頭部検査(MR) | no interval of change since 2005/01/05.                                               | このレポートは、取り消されています。<br>同側基底核、放線冠に多発性陈旧性ラクナ梗塞を認めます。大脳白質内にびまん性にT2強調画像で高信号領域が認められ、正常加齢性変化と考えます。他に特記すべき異常所見を認めませんでした。副ビクワ<br>同側基底核、放線冠に多発性陈旧性ラクナ梗塞を認めます。大脳白質内にびまん性にT2強調画像で高信号領域が認められ、正常加齢性変化と考えます。他に特記すべき異常所見を認めませんでした。副ビクワ<br>同側基底核、放線冠に多発性陈旧性ラクナ梗塞を認めます。大脳白質内にびまん性にT2強調画像で高信号領域が認められ、正常加齢性変化と考えます。他に特記すべき異常所見を認めませんでした。副ビクワ | 2005/05/27 | 5月27日：放射線レポート        |
| 00000010 | 放射線        | 骨(全身)    | s/oNo evidence of bone metastasis/ oTrauma/c/wNo interval change since previous study | このレポートは、取り消されています。<br>造影CT検査時には患者様の同意書を取得して頂くことになっておりますが、今回の検査では同意書取得が確認出来ませんでしたので、やむを得ず単純CTのみを撮影させて頂きました。あしからずご了承下さい。                                                                                                                                                                                                   | 2005/05/27 | 5月27日：放射線レポート本番環境テスト |
| 00000010 | 放射線        | 頭部検査(MR) | no interval of change since 2005/01/05.                                               | このレポートは、取り消されています。<br>同側基底核、放線冠に多発性陈旧性ラクナ梗塞を認めます。大脳白質内にびまん性にT2強調画像で高信号領域が認められ、正常加齢性変化と考えます。他に特記すべき異常所見を認めませんでした。副ビクワ<br>同側基底核、放線冠に多発性陈旧性ラクナ梗塞を認めます。大脳白質内にびまん性にT2強調画像で高信号領域が認められ、正常加齢性変化と考えます。他に特記すべき異常所見を認めませんでした。副ビクワ<br>同側基底核、放線冠に多発性陈旧性ラクナ梗塞を認めます。大脳白質内にびまん性にT2強調画像で高信号領域が認められ、正常加齢性変化と考えます。他に特記すべき異常所見を認めませんでした。副ビクワ | 2005/05/27 | 5月27日：放射線レポート本番環境テスト |

Patient id  
 Study category  
 Report name  
 Diagnosis  
 Findings  
 Comment

Figure 5. Dataset image set aside for investigator confirmation. This is a sample of the list of radiological findings.

81x60mm (300 x 300 DPI)

1  
2  
3  
4  
5  
6  
7  
8  
9  
10  
11  
12  
13  
14  
15  
16  
17  
18  
19  
20  
21  
22  
23  
24  
25  
26  
27  
28  
29  
30  
31  
32  
33  
34  
35  
36  
37  
38  
39  
40  
41  
42  
43  
44  
45  
46  
47  
48  
49  
50  
51  
52  
53  
54  
55  
56  
57  
58  
59  
60

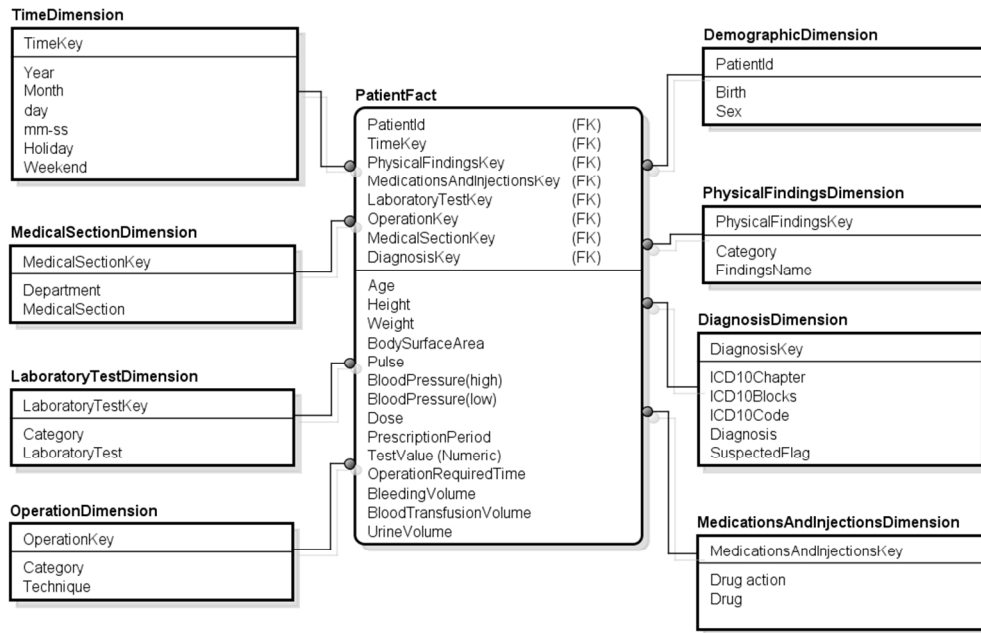

Example of a star schema for clinical information.  
90x58mm (300 x 300 DPI)

Review only



**A pragmatic method for electronic medical-record-based observational studies: developing an electronic medical records retrieval system for clinical research**

|                                 |                                                                                                                                                                                                                                                                                                                                                                                                                                                                                                                                                                                                                                                                                                                                                                                                                                                                                                                                                                                                                                                                                                     |
|---------------------------------|-----------------------------------------------------------------------------------------------------------------------------------------------------------------------------------------------------------------------------------------------------------------------------------------------------------------------------------------------------------------------------------------------------------------------------------------------------------------------------------------------------------------------------------------------------------------------------------------------------------------------------------------------------------------------------------------------------------------------------------------------------------------------------------------------------------------------------------------------------------------------------------------------------------------------------------------------------------------------------------------------------------------------------------------------------------------------------------------------------|
| Journal:                        | <i>BMJ Open</i>                                                                                                                                                                                                                                                                                                                                                                                                                                                                                                                                                                                                                                                                                                                                                                                                                                                                                                                                                                                                                                                                                     |
| Manuscript ID:                  | bmjopen-2012-001622.R1                                                                                                                                                                                                                                                                                                                                                                                                                                                                                                                                                                                                                                                                                                                                                                                                                                                                                                                                                                                                                                                                              |
| Article Type:                   | Research                                                                                                                                                                                                                                                                                                                                                                                                                                                                                                                                                                                                                                                                                                                                                                                                                                                                                                                                                                                                                                                                                            |
| Date Submitted by the Author:   | 14-Sep-2012                                                                                                                                                                                                                                                                                                                                                                                                                                                                                                                                                                                                                                                                                                                                                                                                                                                                                                                                                                                                                                                                                         |
| Complete List of Authors:       | Yamamoto, Keiichi; Kyoto University Hospital, Department of Clinical Trial Design and Management, Translational Research Center<br>Sumi, Eriko; Kyoto University Hospital, Department of Clinical Innovative Medicine, Translational Research Center<br>Yamazaki, Toru; Kyoto University, Department of Oral and Maxillofacial Surgery, Graduate School of Medicine<br>Asai, Keita; Kyoto University, Department of Oral and Maxillofacial Surgery, Graduate School of Medicine<br>Yamori, Masashi; Kyoto University, Department of Oral and Maxillofacial Surgery, Graduate School of Medicine<br>Teramukai, Satoshi; Kyoto University Hospital, Department of Clinical Trial Design and Management, Translational Research Center<br>Bessho, Kazuhisa; Kyoto University, Department of Oral and Maxillofacial Surgery, Graduate School of Medicine<br>Yokode, Masayuki; Kyoto University Hospital, Department of Clinical Innovative Medicine, Translational Research Center<br>Fukushima, Masanori; Foundation for Biomedical Research and Innovation, Translational Research Informatics Center |
| <b>Primary Subject Heading</b>: | Health informatics                                                                                                                                                                                                                                                                                                                                                                                                                                                                                                                                                                                                                                                                                                                                                                                                                                                                                                                                                                                                                                                                                  |
| Secondary Subject Heading:      | Public health, Research methods, Epidemiology                                                                                                                                                                                                                                                                                                                                                                                                                                                                                                                                                                                                                                                                                                                                                                                                                                                                                                                                                                                                                                                       |
| Keywords:                       | Health informatics < BIOTECHNOLOGY & BIOINFORMATICS, ORAL & MAXILLOFACIAL SURGERY, PUBLIC HEALTH, STATISTICS & RESEARCH METHODS, Clinical trials < THERAPEUTICS                                                                                                                                                                                                                                                                                                                                                                                                                                                                                                                                                                                                                                                                                                                                                                                                                                                                                                                                     |
|                                 |                                                                                                                                                                                                                                                                                                                                                                                                                                                                                                                                                                                                                                                                                                                                                                                                                                                                                                                                                                                                                                                                                                     |

SCHOLARONE™  
Manuscripts

1  
2  
3  
4 **A pragmatic method for electronic medical-record-based observational studies:**  
5  
6  
7 **developing an electronic medical records retrieval system for clinical research**  
8  
9

10 Keiichi Yamamoto<sup>1</sup>, Eriko Sumi<sup>2</sup>, Toru Yamazaki<sup>3</sup>, Keita Asai<sup>3</sup>, Masashi Yamori<sup>3</sup>, Satoshi  
11 Teramukai<sup>1</sup>, Kazuhisa Bessho<sup>3</sup>, Masayuki Yokode<sup>2</sup>, Masanori Fukushima<sup>4</sup>  
12  
13  
14  
15

16  
17 <sup>1</sup>Department of Clinical Trial Design and Management, Translational Research Centre, Kyoto  
18 University Hospital, Kyoto, Japan  
19  
20  
21  
22

23  
24 <sup>2</sup>Department of Clinical Innovative Medicine, Translational Research Centre, Kyoto  
25 University Hospital, Kyoto, Japan  
26  
27  
28

29  
30  
31 <sup>3</sup>Department of Oral and Maxillofacial Surgery, Graduate School of Medicine, Kyoto  
32 University, Kyoto, Japan  
33  
34  
35

36  
37 <sup>4</sup>Translational Research Informatics Centre, Foundation for Biomedical Research and  
38 Innovation, Kobe, Japan  
39  
40  
41  
42

43  
44 Corresponding author: Keiichi Yamamoto, 54 Shogoin Kawahara-cho, Sakyo-ku, Kyoto,  
45 606-8507 Japan. E-mail: [kyamamo@kuhp.kyoto-u.ac.jp](mailto:kyamamo@kuhp.kyoto-u.ac.jp), Tel: +81-75-751-4717, Fax  
46 +81-75-751-3399  
47  
48  
49  
50  
51

52  
53  
54 Total number of words: 3,997  
55

56  
57  
58 Short title: A pragmatic method for EMR-based observational studies  
59  
60



1  
2  
3  
4 Keywords: clinical research informatics, data warehouse, OLAP, computable eligibility  
5  
6  
7 criteria, pharmacoepidemiology, hospital-based cohort study  
8  
9  
10  
11  
12  
13  
14  
15  
16  
17  
18  
19  
20  
21  
22  
23  
24  
25  
26  
27  
28  
29  
30  
31  
32  
33  
34  
35  
36  
37  
38  
39  
40  
41  
42  
43  
44  
45  
46  
47  
48  
49  
50  
51  
52  
53  
54  
55  
56  
57  
58  
59  
60

For peer review only

**ABSTRACT**

**Objective:** The use of electronic medical record (EMR) data is necessary to improve clinical research efficiency. However, it is not easy to identify patients who meet research eligibility criteria and collect the necessary information from EMRs because the data collection process must integrate various techniques, including the development of a data warehouse and translation of eligibility criteria into computable criteria. This research aimed to demonstrate an electronic medical records retrieval system (ERS) and an example of a hospital-based cohort study that identified both patients and exposure with an ERS. We also evaluated the feasibility and usefulness of the method. **Design:** The system was developed and evaluated. **Participants:** In total, 800,000 cases of clinical information stored in EMRs at our hospital were used. **Primary and secondary outcome measures:** The feasibility and usefulness of the ERS, the method to convert text from eligible criteria to computable criteria, and a confirmation method to increase research data accuracy. **Results:** To comprehensively and efficiently collect information from patients participating in clinical research, we developed an ERS. To create the ERS database, we designed a multi-dimensional data model optimised for patient identification. We also devised practical methods to translate narrative eligibility criteria into computable parameters. We applied the system to an actual hospital-based cohort study performed at our hospital and converted the test results into computable criteria. Based on this information, we identified eligible patients and extracted data necessary for

1  
2  
3  
4 confirmation by our investigators and for statistical analyses with our ERS. **Conclusion:** We  
5  
6  
7 propose a pragmatic methodology to identify patients from EMRs who meet clinical research  
8  
9  
10 eligibility criteria. Our ERS allowed for the efficient collection of information on the  
11  
12  
13 eligibility of a given patient, reduced the labour required from the investigators, and  
14  
15  
16 improved the reliability of the results.

## 17 18 19 **ARTICLE SUMMARY**

### 20 21 22 **Article focus**

23  
24  
25  
26  
27 The focus of this work was to establish a pragmatic methodology to efficiently collect  
28  
29  
30 information from EMRs about patients who meet clinical research eligibility criteria.  
31  
32

### 33 34 **Key messages**

35  
36  
37 The use of electronic medical record (EMR) data is necessary to improve clinical research  
38  
39  
40 efficiency. However, it is not easy to identify patients who meet research eligibility criteria  
41  
42  
43 and collect necessary data from EMRs because the data collection process must integrate  
44  
45  
46 various techniques, including the development of a data warehouse and the translation of  
47  
48  
49 eligibility criteria into computable criteria. An efficient ERS and a standardised data  
50  
51  
52 processing model that integrates these techniques are essential to facilitate clinical research  
53  
54  
55 that utilises EMRs.  
56  
57  
58  
59  
60

### Strengths and limitations of this study

- Our method uses a specialised data model for patient identification in clinical research and efficient data conversion that does not depend on the EMR database structure when converting narrative criteria to computable criteria.
- We propose that computable criteria should not be a result of the automated conversion of narrative criteria but rather a result of research preparation involving medical concepts that are not expressed logically or explicitly in the narrative criteria. Therefore a large amount of the conversion of the eligibility criteria to computable criteria should be executed at the protocol development stage.
- It is important to further discuss protocol standardisation, including eligibility criteria representation for computable use.
- Enabling ERS use in and across multiple institutions is an important future task.

## BACKGROUND

Medical information technology has recently advanced in many countries, and enormous amounts of clinical data are already stored as electronic medical records (EMRs). Utilising the data collected in EMRs is necessary to improve clinical research efficiency [1-3]. An EMR is a large database of patient data and is used in observational research to investigate the relationships among diseases, treatments, and outcomes [4-7], to conduct surveillance for rare drug reactions [4, 8], and to recruit patients for clinical trials [9-13]. However, it is not easy to identify patients who meet research eligibility criteria and collect necessary information from EMRs [2-3]. Herein, we describe three major issues concerning EMR-based observational studies: EMR patient data retrieval function, eligibility criteria protocol representation, and EMR data accuracy.

To identify patients who meet research eligibility criteria, it is necessary to obtain various types of information stored in EMRs by subject, e.g., diagnosis and prescribed medications. However, the EMR database is designed to facilitate online transaction processing for rapid and detail-oriented clinical information searches on individual patients, and the current EMR system does not facilitate this retrieval function [2-3, 14]. Data warehouses are essential components of data-driven decision support. To allow for efficient research analyses, EMR data must first be warehoused to enable data analyses across patient populations [15-21]. However, health care data modelling is difficult and time-consuming because of the

1  
2  
3  
4 complexity of the medical knowledge involved. Thus, the most common approaches to  
5  
6  
7 clinical data warehouse modelling are variations on the entity-attribute-value (EAV) model  
8  
9  
10 [22-28], where data are stored in a single table with three columns: entity identification,  
11  
12  
13 attribute, and attribute value. The EAV design has advantages, including flexibility and ease  
14  
15  
16 of storage; however, it requires transforming EAV data into another analytical format before  
17  
18  
19 analysis [25, 28]. Online analytical processing (OLAP) is most frequently used for searching  
20  
21  
22 data stored in the data warehouse [29-31]. OLAP systems in relational databases are typically  
23  
24  
25 designed based on Kimball's star schema [32]. However, the star schema was devised to  
26  
27  
28 facilitate online measurement analyses. In health care, this method can be used to  
29  
30  
31 dynamically gather online analyses of numeric data (e.g., a specific dose of a drug for a  
32  
33  
34 specific disease) in clinical practice. Therefore, this method is not suitable for identifying  
35  
36  
37 patients who meet the complicated eligibility criteria for a given clinical research study.  
38  
39  
40 Data-modelling methods that facilitate the identification of patients and enable the collection  
41  
42  
43 of necessary information from EMRs remain to be established [28].

44  
45  
46 Current eligibility criteria are written in a text format that cannot be computationally  
47  
48  
49 processed. Additionally, to be applied in actual EMR, eligible criteria need to be integrated  
50  
51  
52 with the data model of EMRs [33]. Several investigations have sought to establish  
53  
54  
55 computable eligibility criteria [34-41]. However, there is no consensus regarding a standard  
56  
57  
58 patient information model [33], and the eligibility criteria are not yet completely standardised.  
59  
60

1  
2  
3  
4 Using natural language processing (NLP) technologies to convert the text format of eligibility  
5  
6  
7 criteria to a computer or to extract patient identifications from EMRs is far from perfect  
8  
9  
10 without human intervention [3, 42-43].

11  
12  
13 Current EMRs have been used to support claims for medical service fees and the treatments  
14  
15 administered to each patient; therefore, data gathered specifically for research purposes may  
16  
17  
18 be incomplete and unreliable [2-3, 44].  
19  
20  
21

22  
23 Although various investigations on each technique are executed individually, standardised  
24  
25 methods must still be established that integrate these techniques, facilitate the identification  
26  
27  
28 of patients who are eligible for clinical research, and collect necessary information from  
29  
30  
31 EMRs.  
32  
33

## 34 35 **OBJECTIVE**

36  
37  
38 We designed a pragmatic data processing model optimised for patient identification and for  
39  
40 the collection of necessary information from EMRs for clinical research. These tools are  
41  
42  
43 implemented as an electronic medical records retrieval system (ERS) [44].  
44  
45  
46  
47

48  
49 This research aimed to demonstrate an ERS and an example of a hospital-based cohort study  
50  
51 that used the ERS to identify both patients and exposure. Another aim was to evaluate the  
52  
53  
54 feasibility and usefulness of the ERS, the method to convert text form eligible criteria to  
55  
56  
57 computable criteria, and a confirmation method to increase research data accuracy.  
58  
59  
60

## MATERIALS AND METHODS

### Outline of our procedure for patient identification and data collection from the EMR

To identify patients who met the eligibility criteria for the clinical research in question, data were collected in the following ways:

- 1) The text form of the narrative criteria was converted into computable criteria.
- 2) A targeted patient list was created.
- 3) A flag was added for investigators to confirm the targeted patient list.
- 4) Reports were created for the investigators to confirm.
- 5) After confirmation by the investigator, the statistical analyses were executed.

### EMR retrieval system

In our hospital, EMR use was introduced in 2005; approximately 800,000 cases of clinical information have already been stored. To comprehensively and efficiently collect information about patients participating in clinical research, we developed an ERS [44].

EMRs store various types of information, integrating billing, pharmacy, radiology, laboratory information, and others [4]. In creating the ERS database, we designed a new data model based on the star schema that was optimised for patient identification in clinical research. We



1  
2  
3  
4 identified nine data categories from EMRs that are useful for clinical research: demographic  
5  
6 characteristics, physical findings, diagnostic studies, laboratory tests, diagnoses, progress  
7  
8 reports on an EMR template [44-45], medications and injections, operation records, and other  
9  
10 treatments. We then designated these categories to 'entities'. In our hospital, the diagnosis is  
11  
12 managed by codes that were originally defined by our hospital and mapped with International  
13  
14 Statistical Classification of Diseases (ICD) 10 codes [46] for medical insurance purposes.  
15  
16 Operations codes were also managed by codes that originally were defined by our hospital  
17  
18 and mapped with ICD-9 Clinical Modification codes. We identified available columns (e.g.,  
19  
20 ICD code, diagnosis date) from the EMR data model and designated these columns as  
21  
22 'attributes' of the entities.  
23  
24  
25  
26  
27  
28  
29  
30  
31  
32

33  
34 Figure 1 presents our data model. In our model, all entities in a given schema are independent  
35  
36 and complete; this allows for logical operations and for the creation of eligible patient lists  
37  
38 for each respective parameter in a study. The target patient list is generated by combining  
39  
40 these patient lists. The data model also supports the inference of medical concepts expressed  
41  
42 in the eligibility criteria in reference to corresponding patient data accumulated in EMRs  
43  
44  
45  
46  
47  
48 [33-34].  
49  
50

51  
52 In our hospital, a replicate of the EMR database known as 'Open DB' was established for the  
53  
54 secondary use of accumulated EMR data [7]. A data mart for our ERS was created to ensure  
55  
56 that the data retrieval process was practical and independent of the EMR system structure; the  
57  
58  
59  
60

1  
2  
3  
4 data mart was created on the relational database management system by extracting,  
5  
6 transforming, and loading (ETL) information from the Open DB [7, 44]. The ETL process is  
7  
8 performed automatically once nightly except for the 'Progress notes by EMR template' entity,  
9  
10 which is referred directly from the Open DB to ensure real-time visibility for the eClinical  
11  
12 trial [44].  
13  
14  
15  
16

17  
18  
19 An OLAP tool was installed to efficiently search through data from multiple patients [44].  
20

21  
22 The OLAP tool runs in an Internet browser and can generate structured query language  
23  
24 (SQL) based on predefined metadata (i.e., a data model) by defining logical queries (i.e.,  
25  
26 programs) using a graphical user interface (GUI). Moreover, this tool allows reports on  
27  
28 information retrieved from the browser to be transcribed using hypertext markup language  
29  
30 (HTML). The reports are created in various formats, including portable document format  
31  
32 (PDF), comma separated values (CSV), and extensible markup language (XML) [44].  
33  
34  
35  
36  
37  
38

39  
40 To protect personal information in medical records at our hospital, the EMR network is  
41  
42 separated physically from other networks. Our data mart and OLAP servers are deployed in  
43  
44 the same EMR network and managed using the same EMR security policies. Additionally, the  
45  
46 use of our ERS is limited to clinical research approved by the ethics committee at our hospital,  
47  
48 and only designated staff members at our centre are allowed to retrieve data. Our centre  
49  
50 creates and manages ERS user identification separate from the EMRs. For the external output  
51  
52 of CSV and other data, permission must be obtained from our department of medical  
53  
54  
55  
56  
57  
58  
59  
60

informatics, and data extraction must be executed in the presence of supervisors who are responsible for protecting personal information at our hospital.

### Application to clinical research

We applied the system to a hospital-based cohort study performed at our hospital titled 'Risk of osteomyelitis of the jaw induced by oral bisphosphonates (BP) in patients taking medications for osteoporosis: A hospital-based cohort study in Japan' [47], in which we identified eligible patients, extracted research data, and evaluated the feasibility of our system. The ethics committee at Kyoto University Hospital approved this research. A different paper details the purpose, methods, results, and discussion of this research [47].

This research aimed to estimate the risks for osteomyelitis of the jaw in osteoporosis patients at our hospital who had been exposed to oral BP compared to those who had not [48-49].

The eligibility criteria were as follows:

#### Inclusion criteria

- Patients diagnosed with osteoporosis and treated with osteoporosis medications at Kyoto University Hospital between November 2000 and October 2010.
- Patients aged 20 years or older.

#### Exclusion criteria

- Patients with a history of treatment with radiation therapy to the maxillofacial region.
- Patients with primary or metastatic tumours in the maxillofacial region.
- Patients treated with intravenous BP.

The data collected were diagnosis, date of diagnosis, sex, birthdate, and the doses and dates when osteoporosis medications, steroids, anticancer drugs, diabetes drugs and HbA1c tests were administered.

### **Conversion of the text form of the narrative criteria to computable criteria**

To identify eligible patients and collect the necessary data from the EMRs, narrative criteria and data must be converted to computable criteria. Such computable criteria include entities, attributes, logical operators (i.e., 'and' and 'or'), codes, and parameters [33-37]. The clinical research purpose and clinical practice demands made it necessary to perform this task.

We manually executed the conversion from text eligibility criteria to computable criteria. As an example of the conversion from narrative criteria to computable criteria, we present the following two-step conversion procedure:

Step 1: Convert the narrative criteria into entity-level criteria.

Medical concepts expressed as narrative criteria are mapped onto entities in the data model and converted into entity-level criteria. This task is manually performed at the protocol

1  
2  
3  
4 development stage of the study by the investigators. For each entity, a criterion is created to  
5  
6  
7 extract patients who meet each condition. If exclusive conditions for the same entity must be  
8  
9  
10 defined, a different criterion is created. Additionally, the list of codes for drugs and diagnoses  
11  
12 (i.e., ICD-10) is created, and the period of treatments and others are defined by investigators.  
13  
14  
15 In this study, we mapped ‘osteoporotic patients’ onto two entities (i.e., ‘diagnosis’ and  
16  
17 ‘medications and injections’) and converted it to a combination of two criteria (i.e.,  
18  
19 ‘diagnosis of osteoporosis’ and ‘osteoporosis drug administration’). In the test research, we  
20  
21 defined the entity-level criteria according to the entered diagnosis and ordered treatments  
22  
23 rather than the diagnostic criteria of the disease. This process reflects that the test research  
24  
25 aimed to estimate some risks of osteomyelitis of the jaw with BP administration instead of  
26  
27 diagnosing osteoporosis patients accurately. The recorded diagnosis in the EMR was typically  
28  
29 designed to ensure payment for medical claims. We thus sought to reduce the number of false  
30  
31 positives by extracting patients with a given treatment type.  
32  
33  
34  
35  
36  
37  
38  
39  
40  
41

42 Step 2: Convert entity-level criteria into attribute-level criteria (i.e., computable criteria).  
43  
44

45  
46 The abovementioned corresponding codes, date and parameters are mapped onto attributes of  
47  
48 the entity-level criteria, and these factors become computable criteria.  
49  
50  
51

### 52 53 **Creating a targeted patient list** 54

55  
56  
57 A targeted patient list is created from the entire set of patients for whom EMRs have been  
58  
59  
60

1  
2  
3  
4 obtained by defining logical queries (i.e., programs defined by the GUI) based on the  
5  
6  
7 computable criteria included in the ERS.  
8  
9

10 Logical queries are first defined in the ERS to identify patients who meet the conditions for  
11  
12  
13 each criterion. The ERS automatically generates the SQL necessary for data extraction  
14  
15  
16 according to the logical queries. Logical queries are then defined to include or exclude  
17  
18  
19 eligible patients who meet each criterion for the demographic entity. The targeted patient list  
20  
21  
22 is created by executing the logical query. Figure 2 presents an example of an SQL  
23  
24  
25 automatically generated by the ERS.  
26  
27  
28

29 We thus designed our data model to enable the creation of a targeted patient list by defining  
30  
31  
32 the patients extracted from each criterion (i.e., 'in' or 'not in') as conditions for the  
33  
34  
35 demographic entity that was the unique patient list for the entire hospital. If logical queries  
36  
37  
38 are defined using our method, even if the eligibility criteria are complicated, it is not  
39  
40  
41 necessary to dramatically change the SQL structure generated in the ERS.  
42  
43  
44

#### 45 **Flagging entries for investigators to confirm**

46  
47

48 To improve research data accuracy, confirmation by the investigators is necessary. When  
49  
50  
51 confirmation is required, additional information is linked.  
52  
53  
54

55 For the targeted patient list, logical queries are defined to flag certain items according to the  
56  
57  
58 investigators' interest. Necessary logical queries are first defined for each criterion. Logical  
59  
60

1  
2  
3  
4 queries are then defined for addition to the patient list as '1' if the data correspond or '0' if  
5  
6 they do not. Data sets created by these operations are joined by 'union' and pivoted on a  
7  
8 cross-tabulation list using statistical analysis software. We show an example of an SQL  
9  
10 generated by the ERS in Figure 3.  
11  
12  
13

### 14 15 16 **Create reports for investigators to confirm** 17

18  
19  
20 To help investigators confirm the targeted patient list, reports are created by linking the  
21  
22 findings for diagnostic imaging, pathological diagnosis, operations, and other findings.  
23  
24 Investigators confirm these entries using the reports and EMR information, including  
25  
26 progress notes and images. When the diagnosis history, medication, laboratory results,  
27  
28 progress notes, and other information are necessary, the same operation is executed for each  
29  
30 instance. For example, the list of radiological findings involves 'patient id', 'study category',  
31  
32 'report name', 'diagnosis', 'findings', and 'comment'. The reports may improve the  
33  
34 investigators' confirmation efficiency because they prevent the need to refer to the medical  
35  
36 records for each patient who needs confirmation.  
37  
38  
39  
40  
41  
42  
43  
44  
45  
46

### 47 **Confirmation by the investigator and execution of the statistical analyses.** 48

49  
50  
51 The investigators confirm the accumulated data and execute the statistical analysis. In this  
52  
53 test research, two oral and maxillofacial surgeons diagnosed cases by a chart review with an  
54  
55 observation of imaging findings [47].  
56  
57  
58  
59  
60

## Systemic evaluation

To evaluate our system, we collected information about the research period using the recall method. For the accuracy of the data collected by the ERS, we evaluated the results after they were confirmed by the investigator.

## RESULTS

### Computable criteria, datasets, and system evaluation

We present the computable criteria in Table 1. To increase data accuracy, we collected all of the exclusion criteria for the investigators to confirm. As Table 1 shows, we extracted information from EMRs. For investigator confirmation, we also reported all targeted patients using the following lists: osteoporosis drugs administered, oral BP administered, intravenous BP administered, diabetes drugs administered, anticancer drugs administered, steroid drugs administered, osteoporosis diagnoses, oral cancer diagnoses, patients diagnosed with inflammation of the jaw, patients diagnosed with other suspicious diseases, patients diagnosed with diabetes, HbA1c values, radiological findings, pathological findings, and radioisotope findings. These data were extracted from the ERS for statistical analyses, presented in CSV format, and analysed using statistics software.

**Table 1.** Computable criteria for our test research



| Criterion                                                           | Entity             | Operator symbol | Attribute     | Operator symbol | Parameter                                            |
|---------------------------------------------------------------------|--------------------|-----------------|---------------|-----------------|------------------------------------------------------|
| Created a targeted patient list                                     |                    |                 |               |                 |                                                      |
| Inclusion criteria:<br>Osteoporosis diagnosis                       | Diagnosis          | -               | ICD10Code     | In              | (osteoporosis ICD10 code list)                       |
|                                                                     |                    | and             | DiagnosisDate | >=              | '10/01/2000'                                         |
|                                                                     |                    | and             | DiagnosisDate | <=              | '09/30/2010'                                         |
|                                                                     |                    | and             | SuspectedFlag | =               | Fixed                                                |
| Inclusion criteria:<br>Osteoporosis drug<br>administrations         | Medications<br>and | -               | DrugCode      | in              | (osteoporosis drugs code list)                       |
|                                                                     |                    | and             | ExecuteDate   | >=              | '10/01/2000'                                         |
|                                                                     | Injections         | and             | ExecuteDate   | <=              | '09/30/2010'                                         |
| Added a flag for investigators to confirm the targeted patient list |                    |                 |               |                 |                                                      |
| Exclusion criteria:<br>Oral cancer diagnosis                        | Diagnosis          | -               | ICD10Code     | in              | (oral cancer ICD10 code list)                        |
|                                                                     |                    | and             | DiagnosisDate | >=              | '10/01/2000'                                         |
|                                                                     |                    | and             | DiagnosisDate | <=              | '09/30/2010'                                         |
|                                                                     |                    | and             | SuspectedFlag | =               | Fixed                                                |
| Exclusion criteria:<br>Intravenous BP<br>administrations            | Medications<br>and | -               | DrugCode      | in              | (intravenous BP drugs code list)                     |
|                                                                     |                    | and             | ExecuteDate   | >=              | '10/01/2000'                                         |
|                                                                     | Injections         | and             | ExecuteDate   | <=              | '09/30/2010'                                         |
| Oral BP administrations                                             | Medications<br>and | -               | DrugCode      | in              | (oral BP drugs code list)                            |
|                                                                     |                    | and             | ExecuteDate   | >=              | '10/01/2000'                                         |
|                                                                     | Injections         | and             | ExecuteDate   | <=              | '09/30/2010'                                         |
| Inflammatory jaw<br>condition diagnosis                             | Diagnosis          | -               | ICD10Code     | in              | (inflammatory conditions of jaws<br>ICD10 code list) |
|                                                                     |                    | and             | DiagnosisDate | >=              | '10/01/2000'                                         |
|                                                                     |                    | and             | DiagnosisDate | <=              | '09/30/2010'                                         |
|                                                                     |                    | and             | SuspectedFlag | =               | Fixed                                                |
| Other suspicious disease<br>diagnosis                               | Diagnosis          | -               | ICD10Code     | in              | (other suspicious disease ICD10<br>code list)        |
|                                                                     |                    | and             | DiagnosisDate | >=              | '10/01/2000'                                         |
|                                                                     |                    | and             | DiagnosisDate | <=              | '09/30/2010'                                         |
|                                                                     |                    | and             | SuspectedFlag | =               | Fixed                                                |
| Diabetes diagnosis                                                  | Diagnosis          | -               | ICD10Code     | in              | (diabetes ICD10 code list)                           |
|                                                                     |                    | and             | DiagnosisDate | >=              | '10/01/2000'                                         |
|                                                                     |                    | and             | DiagnosisDate | <=              | '09/30/2010'                                         |
|                                                                     |                    | and             | SuspectedFlag | =               | Fixed                                                |

|                                                       |                    |     |                    |          |                                   |
|-------------------------------------------------------|--------------------|-----|--------------------|----------|-----------------------------------|
| Steroid drug administrations                          | Medications        | -   | DrugCode           | in       | (steroid drugs code list)         |
|                                                       | and                | and | ExecuteDate        | >=       | '10/01/2000'                      |
|                                                       | Injections         | and | ExecuteDate        | <=       | '09/30/2010'                      |
| Anticancer drug administrations                       | Medications        | -   | DrugCode           | in       | (anticancer drugs code list)      |
|                                                       | and                | and | ExecuteDate        | >=       | '10/01/2000'                      |
|                                                       | Injections         | and | ExecuteDate        | <=       | '09/30/2010'                      |
| Diabetes drug administrations                         | Medications        | -   | DrugCode           | in       | (diabetes drugs code list)        |
|                                                       | and                | and | ExecuteDate        | >=       | '10/01/2000'                      |
|                                                       | Injections         | and | ExecuteDate        | <=       | '09/30/2010'                      |
| HbA1c test execution                                  | Laboratory Test    | -   | LaboratoryTestCode | in       | (HbA1c test code)                 |
|                                                       |                    | and | TestDate           | >=       | '10/01/2000'                      |
|                                                       |                    | and | TestDate           | <=       | '09/30/2010'                      |
| Created reports for confirmation by the investigators |                    |     |                    |          |                                   |
| Radiological finding reports                          | Diagnostic Studies | -   | ReportName         | in       | (report name list of oral region) |
| Pathologic finding reports                            | Diagnostic Studies | -   | SampleName         | contains | 'bone'                            |
|                                                       |                    | or  | SampleName         | contains | 'jaw'                             |
| Radio isotope finding reports                         | Diagnostic Studies | -   | -                  | -        | -                                 |

BP, bisphosphonates; ICD, International Classification of Diseases; ID, identifications

Among the approximately 800,000 cases at our hospital, 8,772 were categorised using the terms 'Inclusion criteria: Osteoporosis diagnosis'; among this group, 7,195 were further categorised using 'Inclusion criteria: Osteoporosis drug administration'. We then calculated the time that had elapsed since the osteoporosis diagnosis, determined that 7,062 patients were aged 20 years or older, and created a targeted patient list. Among those on the targeted patient list, 23 patients were placed under the heading 'Exclusion criteria: Oral cancer diagnosis', 110 under 'Exclusion criteria: Intravenous BP administration', 4,200 under 'Oral

1  
2  
3  
4 BP administration', 84 under 'Inflammatory jaw condition diagnosis', 2,064 as 'Other  
5  
6 suspicious disease diagnosis', 1,700 as 'Diabetes diagnosis', 4,551 as 'Steroid drug  
7  
8 administration', 904 as 'Anticancer drug administrations', 1,055 as 'Diabetes drug  
9  
10 administrations', and 3,641 as 'HbA1c test execution'. Because of the end point considered,  
11  
12 patients who were classified under 'Inflammatory jaw condition diagnosis' or 'Other  
13  
14 suspicious disease diagnosis' were confirmed using predefined hierarchical diagnostic criteria  
15  
16 by investigators who performed the statistical analyses and arranged the research results. We  
17  
18 show the schema of data collection and confirmation as Figure 4 [47].  
19  
20  
21  
22  
23  
24  
25  
26  
27

28 The accuracy of the data extracted by the ERS was then characterised. Reviewing the medical  
29  
30 records revealed that 2,817 patients were not labelled as 'Oral BP administration', including 7  
31  
32 (1 who received intravenous BP) treated at other hospitals. 6 patients had been treated with  
33  
34 radiation therapy to the oral and maxillofacial regions. Among the 72 patients classified under  
35  
36 'Inflammatory jaw condition diagnosis', 35 cases and 37 non-cases were identified.  
37  
38  
39  
40  
41  
42

43 The data extraction period lasted approximately three months. Ten meetings were held during  
44  
45 the protocol development stage to create and validate the computable criteria and the list of  
46  
47 codes for various drugs and diagnoses (i.e., ICD-10). The time required for logical query  
48  
49 definition when using the ERS was approximately 20 hours. The investigator confirmations  
50  
51 and statistical analyses took approximately four months.  
52  
53  
54  
55  
56  
57  
58  
59  
60

## DISCUSSION

We identified eligible patients for this research and extracted the data necessary for confirmation by investigators and for statistical analyses.

We asked the chart reviewers to evaluate the system in a questionnaire about ‘the effect of computer programming support for data retrieval from the EMR’, ‘the result of the data retrieval’, ‘the positive and negative aspects of our ERS use’, and ‘the aspects of our method that should be improved’. The investigators evaluating the system mentioned that the following points: 1) the method enabled them to extract the necessary data for diagnosis and drug administration without exception; 2) by screening the entire patient population at the hospital using the ERS, they could identify not just eligible patients in the department of oral and maxillofacial surgery but all eligible patients, which reduced the study bias; and 3) by creating reports for confirmation, it enabled investigators to devote their time to reading images, thus effectively reducing the time required for reviewing medical records. The aspects of our method that should be improved are the ‘lack of claim data’ and the ‘administrative complexity of EMR data use’. No negative aspects of our ERS use were noted.

The ERS allowed for the collection of information on patient eligibility by efficiently combining clinical information. Although we did not compare our method with other

1  
2  
3  
4 methods, our proposed method reduced the labour normally required from investigators and  
5  
6 improved the reliability of test research results, which indicated that it was useful.  
7  
8  
9

10 To design the ERS database, we designed a new data model optimised for patient  
11  
12 identification. The main differences between our data model and the star schema were as  
13  
14 follows: 1) demographic data, which were presented in list form in our EMR system, were  
15  
16 presented as a fact-less fact table, and 2) date, time, measurements and text information were  
17  
18 presented in dimension tables [32]. The most significant characteristic of our method for  
19  
20 patient identification is the use of a specialised data model in clinical research and the ability  
21  
22 to execute a large number of conversion tasks at the protocol development stage. Data can be  
23  
24 converted efficiently in a way that does not depend on the EMR database structure when  
25  
26 converting narrative criteria to computable criteria. In this research, we considered whether  
27  
28 data were extracted directly from EMRs at the protocol development stage. However, EMR  
29  
30 data were recorded in a sequential format for every medical practice, and the database  
31  
32 structure was complicated. Comprehending the location and meaning of the necessary data  
33  
34 thus required tremendous effort. It was difficult to make precise logical queries for patient  
35  
36 identification. However, because our ERS data model was arranged by subjects (e.g., tests,  
37  
38 diagnosis), it was easy to interpret the available information. Due to the standardisation of  
39  
40 computable criteria and SQL possible with the ERS, it was also possible to create computable  
41  
42 criteria in little time. Additionally, verifying the patient identification accuracy was easy  
43  
44  
45  
46  
47  
48  
49  
50  
51  
52  
53  
54  
55  
56  
57  
58  
59  
60

1  
2  
3  
4 because it was possible to test each individual criterion.  
5  
6

7  
8 The SQL generated by our ERS does not reduce the time required for data retrieval. Our ERS  
9  
10 also cannot retrieve information that is not in the data model. Current EMRs do not store all  
11  
12 necessary data for clinical research, including information related to pregnancy, performance  
13  
14 status, cancer stage, availability of transportation to the hospital, specific tests that are not  
15  
16 typically performed, drug regimen, outcomes (including death), and adverse events.  
17  
18 Additionally, all tests are not administered to all patients, and necessary information may  
19  
20 have been recorded in medical records at another hospital [44]. To facilitate EMR use in  
21  
22 clinical research, it is necessary to accumulate as much of this information as possible. In the  
23  
24 hospital, much of this information does not integrate well with EMRs, including test reports  
25  
26 stored only in the departmental system [50]. However, it is important to utilise this  
27  
28 information. Additionally, enabling ERS use in and across multiple institutions is also an  
29  
30 important future task.  
31  
32  
33  
34  
35  
36  
37  
38  
39  
40  
41  
42

43  
44 Currently, most clinical research studies that use data from EMRs are planned according to  
45  
46 the concept that the primary use of EMRs is for clinical practice and a secondary use is for  
47  
48 clinical research [44]. Therefore, most investigators attempt to convert the text form  
49  
50 eligibility criteria that already have been defined on a protocol to computable criteria at the  
51  
52 data collecting stage [35. 36]. However, we propose that computable criteria should not be a  
53  
54 result of the automated conversion of narrative criteria but rather a result of research  
55  
56  
57  
58  
59  
60

1  
2  
3  
4 preparation involving medical concepts that are not expressed logically or explicitly in the  
5  
6  
7 narrative criteria. Some medical concepts may be interpreted differently depending on the  
8  
9  
10 research and the investigator caring for the patients. Additionally, current eligibility criteria  
11  
12  
13 are vague or complex, and they do not consider the use of the actual EMR. To convert  
14  
15  
16 computable criteria appropriately, high-level medical decisions to answer the research  
17  
18  
19 question are required. Therefore, we thought that a large amount of the conversion of the  
20  
21  
22 eligibility criteria to computable criteria should be executed at the protocol development  
23  
24  
25 stage. In addition, the conversion process should be divided into entity-level conversions that  
26  
27  
28 require higher medical decisions and attribute-level conversions. To reduce the burden of  
29  
30  
31 conversion, it may be useful to apply NLP technology for the conversion from entity-level  
32  
33  
34 criteria to attribute-level criteria. Moreover, it is important to further discuss protocol  
35  
36  
37 standardisation, including eligibility criteria representation for computable use. For instance,  
38  
39  
40 the attribute-level criteria that describe the search conditions in detail may be useful in global  
41  
42  
43 studies to address diseases that vary according to the diagnostic criteria used in each country.

44  
45 Concerning EMR data accuracy, the ICD10 code (osteomyelitis of the jaw) sensitivity was  
46  
47  
48 48.6% (35/72). The investigators reported 6 simple diagnosis errors, 7 oral BP  
49  
50  
51 administrations at other hospitals, and 6 patients who were treated with radiation therapy in  
52  
53  
54 the oral and maxillofacial region [47]. For the accuracy of current EMRs, the investigators  
55  
56  
57 had to confirm the information. However, the EMRs provided rich confirmation data and  
58  
59  
60

1  
2  
3  
4 were useful in improving research data accuracy. In this study, we checked the data from  
5  
6  
7 actual EMRs manually and identified patients precisely and extensively using coded  
8  
9  
10 information, narrative information, and images. However, only information from existing  
11  
12 EMRs was available. Current EMRs have a high degree of flexibility in data entry and are not  
13  
14 currently managed for research purposes, which decreases their reliability. It is necessary to  
15  
16 improve data quality through quality control without placing too much of a burden on clinical  
17  
18 practice. Alternatively, it may be possible to organise data sufficiently before research use  
19  
20 [51-53]. Standardising the terminology and exchange formats used in the healthcare setting  
21  
22 has facilitated international discourse [46, 54-58]. It is necessary to further discuss not only  
23  
24 clinical practice but also research purposes, particularly how to utilise various standards when  
25  
26 using EMRs beyond the hospital setting.  
27  
28  
29  
30  
31  
32  
33  
34  
35

## 36 **CONCLUSION**

37  
38  
39  
40 We propose a pragmatic method for EMR-based observational studies. Our ERS is already  
41  
42 used to support hospital-based cohort studies, clinical trial recruitment, and the eClinical trial  
43  
44 infrastructure [44] at our centre. We believe an efficient ERS and standardised data  
45  
46 processing model are essential to facilitate clinical research that utilises EMRs.  
47  
48  
49  
50  
51

## 52 **Acknowledgements**

53  
54  
55  
56  
57 The authors would like to acknowledge the staff of the department of medical informatics of  
58  
59  
60



1  
2  
3  
4  
5  
6  
7  
8  
9  
10  
11  
12  
13  
14  
15  
16  
17  
18  
19  
20  
21  
22  
23  
24  
25  
26  
27  
28  
29  
30  
31  
32  
33  
34  
35  
36  
37  
38  
39  
40  
41  
42  
43  
44  
45  
46  
47  
48  
49  
50  
51  
52  
53  
54  
55  
56  
57  
58  
59  
60

Kyoto University Hospital for their generous support.

### **Funding**

This work was supported by the Coordination, Support and Training Program for Translational Research of the Ministry of Education, Culture, Sports, Science and Technology of Japan and by Grants-in-Aid for Scientific Research of Japan (23790566).

### **Competing interests**

None.

### **Contributors**

KY designed the study, developed the ERS system, identified the computable eligibility criteria, wrote logical queries, collected data, and wrote the manuscript. ES is grant holder who designed the study, developed the ERS system, and wrote and edited the manuscript. TY designed and conducted the 'Risk of osteomyelitis of the jaw induced by oral bisphosphonates in patients taking medications for osteoporosis: A hospital-based cohort study in Japan' (BRONJ study) study and the current study, identified the computable eligibility criteria, and wrote and edited the manuscript. KA and MY designed and conducted the BRONJ study. ST designed the study and provided comments and feedback. KB is the principal investigator of the BRONJ study. MY owns the ERS system and supervised the

1  
2  
3  
4 study. MF supervised the study and provided comments and feedback. All of the authors read  
5  
6  
7 and approved the final manuscript.  
8  
9

### 10 **Provenance and peer review**

11  
12  
13  
14 Not commissioned; externally peer reviewed.  
15  
16

### 17 **Data sharing statement**

18  
19  
20  
21  
22 No other data are available to share.  
23  
24  
25  
26  
27  
28  
29  
30  
31  
32  
33  
34  
35  
36  
37  
38  
39  
40  
41  
42  
43  
44  
45  
46  
47  
48  
49  
50  
51  
52  
53  
54  
55  
56  
57  
58  
59  
60

**REFERENCES**

1. Embi PJ, Payne PR. Clinical research informatics: challenges, opportunities and definition for an emerging domain. *J Am Med Inform Assoc.* 2009;**16**(3):316-27
2. Prokosch HU, Ganslandt T. Perspectives for medical informatics. Reusing the electronic medical record for clinical research. *Methods Inf Med.* 2009;**48**(1):38-44.
3. Wasserman RC. Electronic medical records (EMRs), epidemiology, and epistemology: reflections on EMRs and future pediatric clinical research. *Acad Pediatr.* 2011;**11**(4):280-7.
4. Dean BB, Lam J, Natoli JL, et al. Review: Use of electronic medical records for health outcomes research: A literature review. *Med Care Res Rev* 2009;**66**(6):611-38.
5. Tannen RL, Weiner MG, Marcus SM. Simulation of the Syst-Eur randomized control trial using a primary care electronic medical record was feasible. *J Clin Epidemiol* 2006;**59**(3):254-64.
6. Williams JG, Cheung WY, Cohen DR. Can randomised trials rely on existing electronic data? A feasibility study to explore the value of routine data in health technology assessment. *Health Technol Assess* 2003;**7**(26): iii, v-x, 1-117.
7. Yamamoto K, Matsumoto S, Tada H, et al. A data capture system for outcomes studies that integrates with electronic health records: development and potential uses. *J Med Syst*

1  
2  
3  
4 2008;**32**(5):423–7.  
5  
6

7  
8 8. Yamamoto K, Matsumoto S, Yanagihara K, et al. A data-capture system for post-marketing  
9  
10 surveillance of drugs that integrates with hospital electronic health records. Open Access J  
11  
12 Clin Trials 2011;**3**:21–6.  
13  
14

15  
16  
17 9. Embi PJ, Jain A, Clark J, et al. Effect of a clinical trial alert system on physician  
18  
19 participation in trial recruitment. Arch Intern Med 2005;**165**(19):2272-7.  
20  
21  
22

23  
24 10. Campbell MK, Snowdon C, Francis D, et al. Recruitment to randomised trials: strategies  
25  
26 for trial enrollment and participation study. The STEPS study. Health Technol Assess  
27  
28 2007;**11**:iii, ix-105.  
29  
30  
31

32  
33  
34 11. Dugas M, Lange M, Müller-Tidow C, et al. Routine data from hospital information  
35  
36 systems can support patient recruitment for clinical studies. Clin Trials 2010;**7**(2):183-9.  
37  
38  
39

40  
41 12. Thadani SR, Weng C, Bigger JT, et al. Electronic screening improves efficiency in  
42  
43 clinical trial recruitment. J Am Med Inform Assoc 2009;**16**(6):869-73.  
44  
45  
46

47  
48 13. Torgerson JS, Arlinger K, Käppi M, et al. Principles for enhanced recruitment of subjects  
49  
50 in a large clinical trial: The XENDOS study experience. Control Clin Trials  
51  
52 2001;**22**(5):515-25.  
53  
54  
55

56  
57 14. Kristianson KJ, Ljunggren H, Gustafsson LL. Data extraction from a semi-structured  
58  
59  
60

1  
2  
3  
4 electronic medical record system for outpatients: a model to facilitate the access and use of  
5  
6 data for quality control and research. *Health Inform J* 2009;**15**(4):305–319.  
7  
8

9  
10  
11 15. Shim JP. Past, present, and future of decision support technology. *Decis Support Syst*  
12  
13 2002;**33**(2):111-26.  
14

15  
16  
17 16. Prat N. A UML-based data warehouse design method. *Decis Support Syst*  
18  
19 2006;**42**(3):1449-73.  
20  
21

22  
23  
24 17. Park YT. An empirical investigation of the effects of data warehousing on decision  
25  
26 performance. *Inform Manag* 2006;**43**(1):51.  
27  
28

29  
30  
31 18. Schlaps D, Schmid T. Data warehousing in clinical research and development - From  
32  
33 clinical data to knowledge portals. *Pharmind* 2004;**66**(5a):637-46.  
34  
35

36  
37  
38 19. Grant A, Moshyk A, Diab H, et al. Integrating feedback from a clinical data warehouse  
39  
40 into practice organisation. *Int J Med Inform* 2006;**75**(3-4):232-9.  
41  
42

43  
44 20. Junttila K, Meretoja R, Seppälä A, et al. Data warehouse approach to nursing  
45  
46 management. *J Nurs Manag* 2007;**15**(2):155-61.  
47  
48

49  
50  
51 21. Rubin DL, Desser TS. A data warehouse for integrating radiologic and pathologic data. *J*  
52  
53 *Am Coll Radiol* 2008;**5**(3):210-7.  
54  
55

56  
57  
58 22. Johnson SB. Generic data modeling for clinical repositories. *J Am Med Inform Assoc*  
59  
60

1  
2  
3  
4 1996;**3**(5):328-39.  
5  
6

7  
8 23. Nadkarni PM, Brandt C. Data extraction and ad hoc query of an entity—attribute—value  
9  
10 database. *J Am Med Inform Assoc* 1998;**5**:511-27.  
11  
12

13  
14 24. Anhøj J. Generic design of Web-based clinical databases. *J Med Internet Res*  
15  
16 2003;**5**(4):e27.  
17  
18

19  
20  
21 25. Chen RS, Nadkarni P, Marenco L, et al. Exploring performance issues for a clinical  
22  
23 database organized using an entity-attribute-value representation. *J Am Med Inform Assoc*  
24  
25 2000;**7**:475-87.  
26  
27

28  
29  
30 26. Dinu V, Nadkarni P. Guidelines for the effective use of entity-attribute-value modeling for  
31  
32 biomedical databases. *Int J Med Inform* 2007;**76**:769-79.  
33  
34

35  
36  
37 27. Corwin J, Silberschatz A, Miller PL, et al. Dynamic tables: an architecture for managing  
38  
39 evolving, heterogeneous biomedical data in relational database management systems. *J Am*  
40  
41 *Med Inform Assoc* 2007;**14**:86-93.  
42  
43

44  
45  
46 28. Wade TD, Hum RC, Murphy JR. A dimensional bus model for integrating clinical and  
47  
48 research data. *J Am Med Inform Assoc* 2011;**1**:96-102.  
49  
50

51  
52  
53 29. Pardillo J, Mazón JN. Model-driven development of OLAP metadata for relational data  
54  
55 warehouses. *Comput Stand Interfac* 2012;**34**(1):189-202.  
56  
57  
58  
59  
60

- 1  
2  
3  
4 30. Hettler M. Data mining goes multidimensional. *Health Inform.* 1997;**14**(3):43-6, 48, 51-6.  
5  
6  
7  
8 31. Gordon BD, Asplin BR. Using online analytical processing to manage emergency  
9  
10 department operations. *Acad Emerg Med* 2004;**11**(11):1206-12.  
11  
12  
13  
14 32. Kimball R, Reeves L, Ross M, et al. *The Data Warehouse Lifecycle Toolkit*. New York:  
15  
16 John Wiley, 1998.  
17  
18  
19  
20  
21 33. Wang D, Peleg M, Tu SW, et al. Representation primitives, process models and patient  
22  
23 data in computer-interpretable clinical practice guidelines: a literature review of guideline  
24  
25 representation models. *Int J Med Inform.* 2002 **18**;68(1-3)  
26  
27  
28  
29  
30  
31 34. Weng C, Tu SW, Sim I, et al. Formal representation of eligibility criteria: A literature  
32  
33 review. *J Biomed Inform* 2010;**43**(3):451-67.  
34  
35  
36  
37  
38 35. Lonsdale DW, Tustison C, Parker CG, et al. Assessing clinical trial eligibility with logic  
39  
40 expression queries. *Data Knowl Eng* 2008;**66**(1):3-17.  
41  
42  
43  
44 36. Tu SW, Peleg M, Carini S, et al. A practical method for transforming free-text eligibility  
45  
46 criteria into computable criteria. *J Biomed Inform* 2011;**44**(2):239-50.  
47  
48  
49  
50  
51 37. Sordo M, Boxwala AA, Ogunyemi O, et al. Description and status update on GELLO: a  
52  
53 proposed standardized object-oriented expression language for clinical decision support. *Stud*  
54  
55  
56  
57 *Health Technol Inform.* 2004;**107**:164-8.  
58  
59  
60

1  
2  
3  
4 38. Séroussi B, Bouaud J. Using OncoDoc as a computer-based eligibility screening system  
5  
6  
7 to improve accrual onto breast cancer clinical trials. *Artif Intell Med* 2003;**29**(1-2):153-67.  
8  
9

10 39. CDISC ASPIRE: Integration of clinical research and EHR: Eligibility coding standards.  
11  
12  
13 [http://crisummit2010.amia.org/files/symposium2008/S14\\_Niland.pdf](http://crisummit2010.amia.org/files/symposium2008/S14_Niland.pdf) (accessed 31 Mar  
14  
15  
16 2012).  
17  
18  
19

20 40. CDISC Study Design Model: SDM-XML Version 1.0.  
21  
22  
23 <http://www.cdisc.org/stuff/contentmgr/files/0/8c85b168e80d6834ded59339b55fdb7/misc/cd>  
24  
25  
26 [isc\\_sdm\\_xml\\_1.0.pdf](isc_sdm_xml_1.0.pdf) (accessed 31 Mar 2012).  
27  
28  
29

30 41. US. National Cancer Institute (NCI). caMATCH.  
31  
32  
33 <https://cabig.nci.nih.gov/community/tools/caMATCH> (accessed 31 Mar 2012).  
34  
35  
36

37 42. Jagannathan V, Mullett CJ, Arbogast JG, et al. Assessment of commercial NLP engines for  
38  
39 medication information extraction from dictated clinical notes. *Int J Med Inform*  
40  
41  
42 2009;**78**(4):284-91.  
43  
44  
45

46 43. Pakhomov S, Weston SA, Jacobsen SJ, et al. Electronic medical records for clinical  
47  
48  
49 research: application to the identification of heart failure. *Am J Manag Care*  
50  
51  
52 2007;**13**(6):281-8.  
53  
54  
55

56 44. Yamamoto K, Yamanaka K, Hatano E, et al. An eClinical trial system for cancer that  
57  
58  
59  
60



1  
2  
3  
4 integrates with clinical pathways and electronic medical records. Clin trials 2012 9: 408-417.  
5  
6

7  
8 45. Matsumura Y, Kuwata S, Yamamoto Y, et al. Template-based data entry for general  
9  
10 description in medical records and data transfer to data warehouse for analysis. Stud Health  
11  
12 Technol Inform 2007;**129**(Pt 1):412–416.  
13  
14

15  
16  
17 46. World Health Organization (WHO). International Classification of Diseases (ICD).  
18  
19  
20 <http://www.who.int/classifications/icd/en/> (accessed 31 Mar 2012).  
21  
22

23  
24 47. Yamazaki T, Yamori M, Yamamoto K, et al, Risk of osteomyelitis of the jaw induced by  
25  
26 oral bisphosphonates in patients taking medications for osteoporosis: A hospital-based cohort  
27  
28 study in Japan, Bone 2012: 51(5) 882–887.  
29  
30  
31

32  
33  
34 48. Fellows JL, Rindal DB, Barasch A, et al. ONJ in two dental practice-based research  
35  
36 network regions. J Dent Res 2011;**90**(4):433-8.  
37  
38

39  
40 49. Vestergaard P, Schwartz K, Rejnmark L, et al. Oral bisphosphonate use increases the risk  
41  
42 for inflammatory jaw disease: a cohort study. J Oral Maxillofac Surg. 2012 70(4):821-829.  
43  
44

45  
46  
47 50. Shortliffe EH, Cimino JJ. Biomedical Informatics: Computer Applications in Health Care  
48  
49 and Biomedicine. Health Informatics series. Springer, 2006.  
50  
51

52  
53  
54 51. McFadden E. Management of data in clinical trials. 2nd ed. Hoboken, NJ:  
55  
56 Wiley-Interscience, 2007.  
57  
58  
59  
60

- 1  
2  
3  
4 52. Zhengwu L, Jing S. Clinical data management: current status, challenges, and future  
5  
6  
7 directions from industry perspectives. *Open Access J Clin Trials* 2010;**2**: 93–105.  
8  
9
- 10 53. Data Management Association (DAMA) International. Data management body of  
11  
12 knowledge. <http://www.dama.org/i4a/pages/index.cfm?pageid=3364> (accessed 31 Mar 2012).  
13  
14  
15
- 16 54. MedDRA MSSO. MedDRA MSSO. <http://www.meddramsso.com/> (accessed 31 Mar  
17  
18 2012).  
19  
20  
21  
22
- 23 55. US National Library of Medicine. SNOMED clinical terms,  
24  
25 [http://www.nlm.nih.gov/research/umls/Snomed/snomed\\_main.html](http://www.nlm.nih.gov/research/umls/Snomed/snomed_main.html) (accessed 31 Mar 2012).  
26  
27  
28  
29
- 30 56. Clinical Data Interchange Standards Consortium (CDISC). Study data tabulation model  
31  
32 (SDTM). <http://www.cdisc.org/sdtm> (accessed 31 Mar 2012).  
33  
34  
35  
36
- 37 57. Huff S. Development of the logical observation identifier names and codes (LOINC)  
38  
39 vocabulary. *J Am Med Inform Assoc* 1998;**5**(3):276-92.  
40  
41  
42  
43
- 44 58. Health level seven (HL7). <http://www.hl7.com/> (accessed 31 Mar 2012).  
45  
46  
47  
48  
49  
50  
51  
52  
53  
54  
55  
56  
57  
58  
59  
60

1  
2  
3  
4 **FIGURE CAPTIONS**  
5  
6  
7

8 **Figure 1.** Data model for our EMR retrieval system.  
9

10  
11 **Figure 2.** Example SQL to create the target patient list.  
12

13  
14  
15 **Figure 3.** Example SQL to flag the target patient report for investigator confirmation.  
16  
17

18  
19 **Figure 4.** Schema of data collection and confirmation.  
20  
21  
22  
23  
24  
25  
26  
27  
28  
29  
30  
31  
32  
33  
34  
35  
36  
37  
38  
39  
40  
41  
42  
43  
44  
45  
46  
47  
48  
49  
50  
51  
52  
53  
54  
55  
56  
57  
58  
59  
60

1  
2  
3  
4  
5  
6  
7  
8  
9  
10  
11  
12  
13  
14  
15  
16  
17  
18  
19  
20  
21  
22  
23  
24  
25  
26  
27  
28  
29  
30  
31  
32  
33  
34  
35  
36  
37  
38  
39  
40  
41  
42  
43  
44  
45  
46  
47  
48  
49  
50  
51  
52  
53  
54  
55  
56  
57  
58  
59  
60



Figure 1. Data model for our EMR retrieval system.  
109x104mm (300 x 300 DPI)

only

1  
2  
3  
4  
5  
6  
7  
8 Create View\_PatientsList as  
9 Select PatientId From Demographic

10 Where

11 a. PatientId in (

```
12 Select PatientId From Diagnosis  
13 Where ICD10Code in (osteoporosis ICD10 code list) and  
14     DiagnosisDate >= '10/01/2000' and DiagnosisDate <= '09/30/2010' and  
15     SuspectedFlag = 'Fixed' )
```

16  
17 and

18 a. PatientId in (

```
19 Select PatientId From MedicationsAndInjections  
20 Where DrugCode in (osteoporosis drugs code list) and  
21     ExecuteDate >= '10/01/2000' and ExecuteDate <= '09/30/2010' )
```

22  
23 and

24 a. PatientId not in (

```
25 Select PatientId From MedicationsAndInjections  
26 Where DrugCode in (intravenous BP drug code list) and  
27     ExecuteDate >= '10/01/2000' and ExecuteDate <= '09/30/2010' )
```

28  
29  
30  
31  
32 Figure 2. Example SQL to create the target patient list.  
33 81x60mm (300 x 300 DPI)

```

1
2
3
4
5
6
7 Select PatientId, Oral BP administrations, 1 From View_PatientsList a
8 Where a. PatientId in (
9   Select PatientId From MedicationsAndInjections
10  Where DrugCode in (oral BP drugs code list) and
11    ExecuteDate >= '10/01/2000' and ExecuteDate <= '09/30/2010 ' )
12 Union all
13 Select PatientId, Oral BP administrations, 0 From View_PatientsList a
14 Where a. PatientId not in (
15   Select PatientId From MedicationsAndInjections
16   Where DrugCode in (oral BP drugs code list) and
17     ExecuteDate >= '10/01/2000' and ExecuteDate <= '09/30/2010')
18 Union all
19 Select PatientId, Inflammatory jaw condition diagnosis, 1 From View_PatientsList a
20 Where a. PatientId in (
21   Select PatientId From Diagnosis
22   Where ICD10Code in (inflammatory conditions of jaws ICD10 code list) and
23     DiagnosisDate >= '10/01/2000' and DiagnosisDate <= '09/30/2010' and SuspectedFlag = 'Fixed')
24 Union all
25 Select PatientId, Inflammatory jaw condition diagnosis, 0 From View_PatientsList a
26 Where a. PatientId not in (
27   Select PatientId From Diagnosis
28   Where ICD10Code in (inflammatory conditions of jaws ICD10 code list ) and
29     DiagnosisDate >= '10/01/2000' and DiagnosisDate <= '09/30/2010' and SuspectedFlag = 'Fixed')
30
31
32
33
34
35
36
37
38
39
40
41
42
43
44
45
46
47
48
49
50
51
52
53
54
55
56
57
58
59
60

```

Figure 3. Example SQL to flag the target patient report for investigator confirmation.  
81x60mm (300 x 300 DPI)

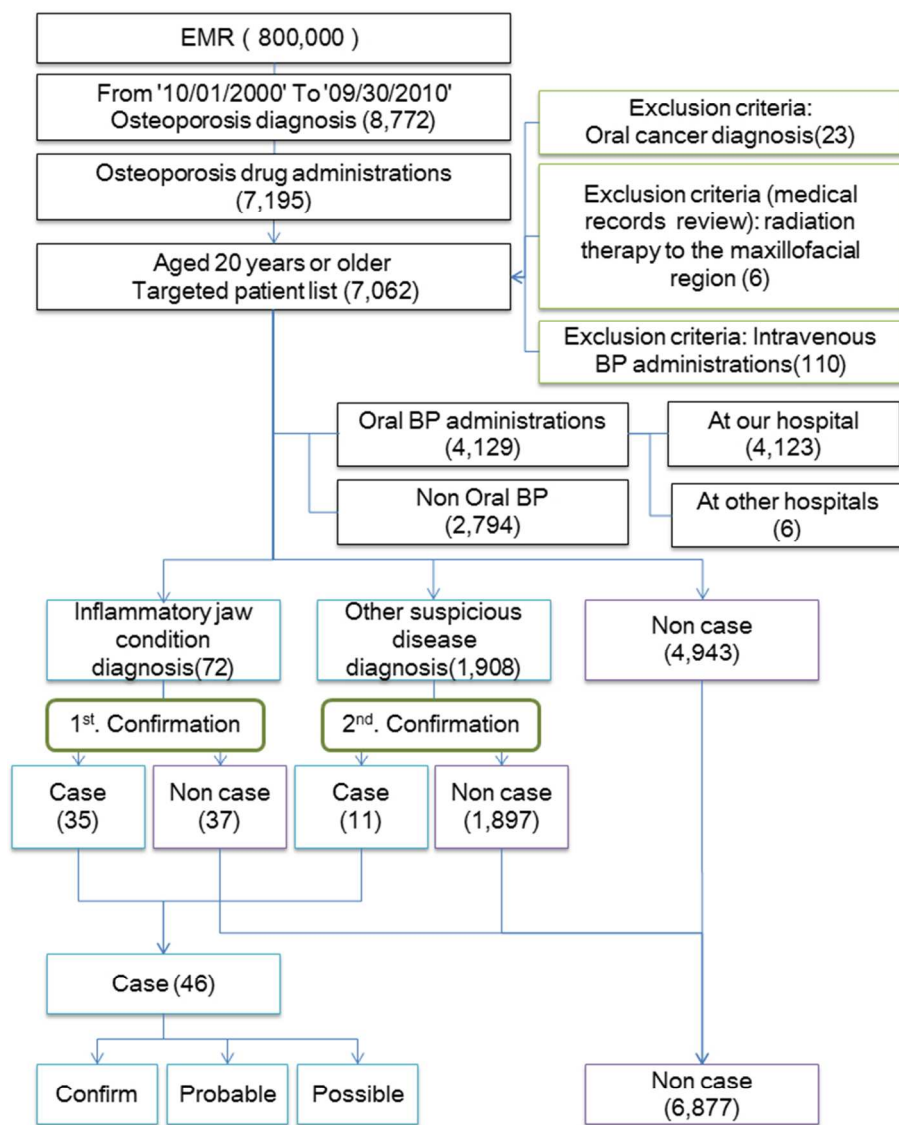

Figure 4. Schema of data collection and confirmation.  
60x81mm (300 x 300 DPI)

1  
2  
3  
4 **A pragmatic method for electronic medical-record-based observational studies:**  
5  
6  
7 **developing an electronic medical records retrieval system for clinical research**  
8  
9

10 Keiichi Yamamoto<sup>1</sup>, Eriko Sumi<sup>2</sup>, Toru Yamazaki<sup>3</sup>, Keita Asai<sup>3</sup>, Masashi Yamori<sup>3</sup>, Satoshi  
11 Teramukai<sup>1</sup>, Kazuhisa Bessho<sup>3</sup>, Masayuki Yokode<sup>2</sup>, Masanori Fukushima<sup>4</sup>  
12  
13  
14  
15

16  
17 <sup>1</sup>Department of Clinical Trial Design and Management, Translational Research Centre, Kyoto  
18 University Hospital, Kyoto, Japan  
19  
20  
21  
22

23  
24 <sup>2</sup>Department of Clinical Innovative Medicine, Translational Research Centre, Kyoto  
25 University Hospital, Kyoto, Japan  
26  
27  
28

29  
30  
31 <sup>3</sup>Department of Oral and Maxillofacial Surgery, Graduate School of Medicine, Kyoto  
32 University, Kyoto, Japan  
33  
34  
35

36  
37 <sup>4</sup>Translational Research Informatics Centre, Foundation for Biomedical Research and  
38 Innovation, Kobe, Japan  
39  
40  
41  
42

43  
44 Corresponding author: Keiichi Yamamoto, 54 Shogoin Kawahara-cho, Sakyo-ku, Kyoto,  
45 606-8507 Japan. E-mail: [kyamamo@kuhp.kyoto-u.ac.jp](mailto:kyamamo@kuhp.kyoto-u.ac.jp), Tel: +81-75-751-4717, Fax  
46 +81-75-751-3399  
47  
48  
49  
50

51  
52  
53  
54 Total number of words: 3,997  
55

56  
57  
58 Short title: A pragmatic method for EMR-based observational studies  
59  
60



1  
2  
3  
4 Keywords: clinical research informatics, data warehouse, OLAP, computable eligibility  
5  
6  
7 criteria, pharmacoepidemiology, hospital-based cohort study  
8  
9  
10  
11  
12  
13  
14  
15  
16  
17  
18  
19  
20  
21  
22  
23  
24  
25  
26  
27  
28  
29  
30  
31  
32  
33  
34  
35  
36  
37  
38  
39  
40  
41  
42  
43  
44  
45  
46  
47  
48  
49  
50  
51  
52  
53  
54  
55  
56  
57  
58  
59  
60

For peer review only

## ABSTRACT

**Objective:** The use of electronic medical record (EMR) data is necessary to improve clinical research efficiency. However, it is not easy to identify patients who meet research eligibility criteria and collect the necessary information from EMRs because the data collection process must integrate various techniques, including the development of a data warehouse and translation of eligibility criteria into computable criteria. This research aimed to demonstrate an electronic medical records retrieval system (ERS) and an example of a hospital-based cohort study that identified both patients and exposure with an ERS. We also evaluated the feasibility and usefulness of the method. **Design:** The system was developed and evaluated.

**Participants:** In total, 800,000 cases of clinical information stored in EMRs at our hospital were used. **Primary and secondary outcome measures:** The feasibility and usefulness of the ERS, the method to convert text from eligible criteria to computable criteria, and a confirmation method to increase research data accuracy. **Results:** To comprehensively and efficiently collect information from patients participating in clinical research, we developed an ERS. To create the ERS database, we designed a multi-dimensional data model optimised for patient identification. We also devised practical methods to translate narrative eligibility criteria into computable parameters. We applied the system to an actual hospital-based cohort study performed at our hospital and converted the test results into computable criteria. Based on this information, we identified eligible patients and extracted data necessary for

1  
2  
3  
4 confirmation by our investigators and for statistical analyses with our ERS. **Conclusion:** We  
5  
6  
7 propose a pragmatic methodology to identify patients from EMRs who meet clinical research  
8  
9  
10 eligibility criteria. Our ERS allowed for the efficient collection of information on the  
11  
12  
13 eligibility of a given patient, reduced the labour required from the investigators, and  
14  
15  
16 improved the reliability of the results.

## 17 18 19 **ARTICLE SUMMARY**

### 20 21 22 **Article focus**

23  
24  
25  
26  
27 The focus of this work was to establish a pragmatic methodology to efficiently collect  
28  
29  
30 information from EMRs about patients who meet clinical research eligibility criteria.  
31  
32

### 33 34 **Key messages**

35  
36  
37 The use of electronic medical record (EMR) data is necessary to improve clinical research  
38  
39  
40 efficiency. However, it is not easy to identify patients who meet research eligibility criteria  
41  
42  
43 and collect necessary data from EMRs because the data collection process must integrate  
44  
45  
46 various techniques, including the development of a data warehouse and the translation of  
47  
48  
49 eligibility criteria into computable criteria. An efficient ERS and a standardised data  
50  
51  
52 processing model that integrates these techniques are essential to facilitate clinical research  
53  
54  
55 that utilises EMRs.  
56  
57  
58  
59  
60

### Strengths and limitations of this study

- Our method uses a specialised data model for patient identification in clinical research and efficient data conversion that does not depend on the EMR database structure when converting narrative criteria to computable criteria.
- We propose that computable criteria should not be a result of the automated conversion of narrative criteria but rather a result of research preparation involving medical concepts that are not expressed logically or explicitly in the narrative criteria. Therefore a large amount of the conversion of the eligibility criteria to computable criteria should be executed at the protocol development stage.
- It is important to further discuss protocol standardisation, including eligibility criteria representation for computable use.
- Enabling ERS use in and across multiple institutions is an important future task.

## BACKGROUND

Medical information technology has recently advanced in many countries, and enormous amounts of clinical data are already stored as electronic medical records (EMRs). Utilising the data collected in EMRs is necessary to improve clinical research efficiency [1-3]. An EMR is a large database of patient data and is used in observational research to investigate the relationships among diseases, treatments, and outcomes [4-7], to conduct surveillance for rare drug reactions [4, 8], and to recruit patients for clinical trials [9-13]. However, it is not easy to identify patients who meet research eligibility criteria and collect necessary information from EMRs [2-3]. Herein, we describe three major issues concerning EMR-based observational studies: EMR patient data retrieval function, eligibility criteria protocol representation, and EMR data accuracy.

To identify patients who meet research eligibility criteria, it is necessary to obtain various types of information stored in EMRs by subject, e.g., diagnosis and prescribed medications. However, the EMR database is designed to facilitate online transaction processing for rapid and detail-oriented clinical information searches on individual patients, and the current EMR system does not facilitate this retrieval function [2-3, 14]. Data warehouses are essential components of data-driven decision support. To allow for efficient research analyses, EMR data must first be warehoused to enable data analyses across patient populations [15-21]. However, health care data modelling is difficult and time-consuming because of the

1  
2  
3  
4 complexity of the medical knowledge involved. Thus, the most common approaches to  
5  
6  
7 clinical data warehouse modelling are variations on the entity-attribute-value (EAV) model  
8  
9  
10 [22-28], where data are stored in a single table with three columns: entity identification,  
11  
12  
13 attribute, and attribute value. The EAV design has advantages, including flexibility and ease  
14  
15  
16 of storage; however, it requires transforming EAV data into another analytical format before  
17  
18  
19 analysis [25, 28]. Online analytical processing (OLAP) is most frequently used for searching  
20  
21  
22 data stored in the data warehouse [29-31]. OLAP systems in relational databases are typically  
23  
24  
25 designed based on Kimball's star schema [32]. However, the star schema was devised to  
26  
27  
28 facilitate online measurement analyses. In health care, this method can be used to  
29  
30  
31 dynamically gather online analyses of numeric data (e.g., a specific dose of a drug for a  
32  
33  
34 specific disease) in clinical practice. Therefore, this method is not suitable for identifying  
35  
36  
37 patients who meet the complicated eligibility criteria for a given clinical research study.  
38  
39  
40 Data-modelling methods that facilitate the identification of patients and enable the collection  
41  
42  
43 of necessary information from EMRs remain to be established [28].  
44

45  
46  
47 Current eligibility criteria are written in a text format that cannot be computationally  
48  
49  
50 processed. Additionally, to be applied in actual EMR, eligible criteria need to be integrated  
51  
52  
53 with the data model of EMRs [33]. Several investigations have sought to establish  
54  
55  
56 computable eligibility criteria [34-41]. However, there is no consensus regarding a standard  
57  
58  
59 patient information model [33], and the eligibility criteria are not yet completely standardised.  
60

1  
2  
3  
4 Using natural language processing (NLP) technologies to convert the text format of eligibility  
5  
6  
7 criteria to a computer or to extract patient identifications from EMRs is far from perfect  
8  
9  
10 without human intervention [3, 42-43].

11  
12  
13 Current EMRs have been used to support claims for medical service fees and the treatments  
14  
15 administered to each patient; therefore, data gathered specifically for research purposes may  
16  
17  
18 be incomplete and unreliable [2-3, 44].  
19  
20  
21

22  
23 Although various investigations on each technique are executed individually, standardised  
24  
25 methods must still be established that integrate these techniques, facilitate the identification  
26  
27  
28 of patients who are eligible for clinical research, and collect necessary information from  
29  
30  
31 EMRs.  
32  
33

## 34 35 **OBJECTIVE**

36  
37  
38 We designed a pragmatic data processing model optimised for patient identification and for  
39  
40  
41 the collection of necessary information from EMRs for clinical research. These tools are  
42  
43  
44 implemented as an electronic medical records retrieval system (ERS) [44].  
45  
46  
47

48  
49 This research aimed to demonstrate an ERS and an example of a hospital-based cohort study  
50  
51  
52 that used the ERS to identify both patients and exposure. Another aim was to evaluate the  
53  
54  
55 feasibility and usefulness of the ERS, the method to convert text form eligible criteria to  
56  
57  
58 computable criteria, and a confirmation method to increase research data accuracy.  
59  
60

## MATERIALS AND METHODS

### Outline of our procedure for patient identification and data collection from the EMR

To identify patients who met the eligibility criteria for the clinical research in question, data were collected in the following ways:

- 1) The text form of the narrative criteria was converted into computable criteria.
- 2) A targeted patient list was created.
- 3) A flag was added for investigators to confirm the targeted patient list.
- 4) Reports were created for the investigators to confirm.
- 5) After confirmation by the investigator, the statistical analyses were executed.

### EMR retrieval system

In our hospital, EMR use was introduced in 2005; approximately 800,000 cases of clinical information have already been stored. To comprehensively and efficiently collect information about patients participating in clinical research, we developed an ERS [44].

EMRs store various types of information, integrating billing, pharmacy, radiology, laboratory information, and others [4]. In creating the ERS database, we designed a new data model based on the star schema that was optimised for patient identification in clinical research. We



1  
2  
3  
4 identified nine data categories from EMRs that are useful for clinical research: demographic  
5  
6 characteristics, physical findings, diagnostic studies, laboratory tests, diagnoses, progress  
7  
8 reports on an EMR template [44-45], medications and injections, operation records, and other  
9  
10 treatments. We then designated these categories to 'entities'. In our hospital, the diagnosis is  
11  
12 managed by codes that were originally defined by our hospital and mapped with International  
13  
14 Statistical Classification of Diseases (ICD) 10 codes [46] for medical insurance purposes.  
15  
16 Operations codes were also managed by codes that originally were defined by our hospital  
17  
18 and mapped with ICD-9 Clinical Modification codes. We identified available columns (e.g.,  
19  
20 ICD code, diagnosis date) from the EMR data model and designated these columns as  
21  
22 'attributes' of the entities.  
23  
24  
25  
26  
27  
28  
29  
30  
31  
32

33  
34 Figure 1 presents our data model. In our model, all entities in a given schema are independent  
35  
36 and complete; this allows for logical operations and for the creation of eligible patient lists  
37  
38 for each respective parameter in a study. The target patient list is generated by combining  
39  
40 these patient lists. The data model also supports the inference of medical concepts expressed  
41  
42 in the eligibility criteria in reference to corresponding patient data accumulated in EMRs  
43  
44  
45  
46  
47  
48 [33-34].  
49  
50

51  
52 In our hospital, a replicate of the EMR database known as 'Open DB' was established for the  
53  
54 secondary use of accumulated EMR data [7]. A data mart for our ERS was created to ensure  
55  
56  
57  
58 that the data retrieval process was practical and independent of the EMR system structure; the  
59  
60

1  
2  
3  
4 data mart was created on the relational database management system by extracting,  
5  
6  
7 transforming, and loading (ETL) information from the Open DB [7, 44]. The ETL process is  
8  
9  
10 performed automatically once nightly except for the 'Progress notes by EMR template' entity,  
11  
12  
13 which is referred directly from the Open DB to ensure real-time visibility for the eClinical  
14  
15  
16 trial [44].

17  
18  
19 An OLAP tool was installed to efficiently search through data from multiple patients [44].

20  
21  
22 The OLAP tool runs in an Internet browser and can generate structured query language  
23  
24  
25 (SQL) based on predefined metadata (i.e., a data model) by defining logical queries (i.e.,  
26  
27  
28 programs) using a graphical user interface (GUI). Moreover, this tool allows reports on  
29  
30  
31 information retrieved from the browser to be transcribed using hypertext markup language  
32  
33  
34 (HTML). The reports are created in various formats, including portable document format  
35  
36  
37 (PDF), comma separated values (CSV), and extensible markup language (XML) [44].

38  
39  
40 To protect personal information in medical records at our hospital, the EMR network is  
41  
42  
43 separated physically from other networks. Our data mart and OLAP servers are deployed in  
44  
45  
46 the same EMR network and managed using the same EMR security policies. Additionally, the  
47  
48  
49 use of our ERS is limited to clinical research approved by the ethics committee at our hospital,  
50  
51  
52 and only designated staff members at our centre are allowed to retrieve data. Our centre  
53  
54  
55 creates and manages ERS user identification separate from the EMRs. For the external output  
56  
57  
58 of CSV and other data, permission must be obtained from our department of medical  
59  
60

1  
2  
3  
4 informatics, and data extraction must be executed in the presence of supervisors who are  
5  
6  
7 responsible for protecting personal information at our hospital.  
8  
9

### 10 **Application to clinical research**

11  
12  
13  
14 We applied the system to a hospital-based cohort study performed at our hospital titled 'Risk  
15  
16  
17 of osteomyelitis of the jaw induced by oral bisphosphonates (BP) in patients taking  
18  
19  
20 medications for osteoporosis: A hospital-based cohort study in Japan' [47], in which we  
21  
22  
23 identified eligible patients, extracted research data, and evaluated the feasibility of our system.  
24  
25  
26 The ethics committee at Kyoto University Hospital approved this research. A different paper  
27  
28  
29 details the purpose, methods, results, and discussion of this research [47].  
30  
31

32  
33 This research aimed to estimate the risks for osteomyelitis of the jaw in osteoporosis patients  
34  
35  
36 at our hospital who had been exposed to oral BP compared to those who had not [48-49].  
37  
38

39 The eligibility criteria were as follows:  
40  
41

#### 42 **Inclusion criteria**

- 43  
44  
45  
46  
47 • Patients diagnosed with osteoporosis and treated with osteoporosis medications at  
48  
49  
50  
51  
52  
53  
54  
55  
56  
57  
58  
59  
60  
61  
62  
63  
64  
65  
66  
67  
68  
69  
70  
71  
72  
73  
74  
75  
76  
77  
78  
79  
80  
81  
82  
83  
84  
85  
86  
87  
88  
89  
90  
91  
92  
93  
94  
95  
96  
97  
98  
99  
100  
101  
102  
103  
104  
105  
106  
107  
108  
109  
110  
111  
112  
113  
114  
115  
116  
117  
118  
119  
120  
121  
122  
123  
124  
125  
126  
127  
128  
129  
130  
131  
132  
133  
134  
135  
136  
137  
138  
139  
140  
141  
142  
143  
144  
145  
146  
147  
148  
149  
150  
151  
152  
153  
154  
155  
156  
157  
158  
159  
160  
161  
162  
163  
164  
165  
166  
167  
168  
169  
170  
171  
172  
173  
174  
175  
176  
177  
178  
179  
180  
181  
182  
183  
184  
185  
186  
187  
188  
189  
190  
191  
192  
193  
194  
195  
196  
197  
198  
199  
200  
201  
202  
203  
204  
205  
206  
207  
208  
209  
210  
211  
212  
213  
214  
215  
216  
217  
218  
219  
220  
221  
222  
223  
224  
225  
226  
227  
228  
229  
230  
231  
232  
233  
234  
235  
236  
237  
238  
239  
240  
241  
242  
243  
244  
245  
246  
247  
248  
249  
250  
251  
252  
253  
254  
255  
256  
257  
258  
259  
260  
261  
262  
263  
264  
265  
266  
267  
268  
269  
270  
271  
272  
273  
274  
275  
276  
277  
278  
279  
280  
281  
282  
283  
284  
285  
286  
287  
288  
289  
290  
291  
292  
293  
294  
295  
296  
297  
298  
299  
300  
301  
302  
303  
304  
305  
306  
307  
308  
309  
310  
311  
312  
313  
314  
315  
316  
317  
318  
319  
320  
321  
322  
323  
324  
325  
326  
327  
328  
329  
330  
331  
332  
333  
334  
335  
336  
337  
338  
339  
340  
341  
342  
343  
344  
345  
346  
347  
348  
349  
350  
351  
352  
353  
354  
355  
356  
357  
358  
359  
360  
361  
362  
363  
364  
365  
366  
367  
368  
369  
370  
371  
372  
373  
374  
375  
376  
377  
378  
379  
380  
381  
382  
383  
384  
385  
386  
387  
388  
389  
390  
391  
392  
393  
394  
395  
396  
397  
398  
399  
400  
401  
402  
403  
404  
405  
406  
407  
408  
409  
410  
411  
412  
413  
414  
415  
416  
417  
418  
419  
420  
421  
422  
423  
424  
425  
426  
427  
428  
429  
430  
431  
432  
433  
434  
435  
436  
437  
438  
439  
440  
441  
442  
443  
444  
445  
446  
447  
448  
449  
450  
451  
452  
453  
454  
455  
456  
457  
458  
459  
460  
461  
462  
463  
464  
465  
466  
467  
468  
469  
470  
471  
472  
473  
474  
475  
476  
477  
478  
479  
480  
481  
482  
483  
484  
485  
486  
487  
488  
489  
490  
491  
492  
493  
494  
495  
496  
497  
498  
499  
500  
501  
502  
503  
504  
505  
506  
507  
508  
509  
510  
511  
512  
513  
514  
515  
516  
517  
518  
519  
520  
521  
522  
523  
524  
525  
526  
527  
528  
529  
530  
531  
532  
533  
534  
535  
536  
537  
538  
539  
540  
541  
542  
543  
544  
545  
546  
547  
548  
549  
550  
551  
552  
553  
554  
555  
556  
557  
558  
559  
560  
561  
562  
563  
564  
565  
566  
567  
568  
569  
570  
571  
572  
573  
574  
575  
576  
577  
578  
579  
580  
581  
582  
583  
584  
585  
586  
587  
588  
589  
590  
591  
592  
593  
594  
595  
596  
597  
598  
599  
600  
601  
602  
603  
604  
605  
606  
607  
608  
609  
610  
611  
612  
613  
614  
615  
616  
617  
618  
619  
620  
621  
622  
623  
624  
625  
626  
627  
628  
629  
630  
631  
632  
633  
634  
635  
636  
637  
638  
639  
640  
641  
642  
643  
644  
645  
646  
647  
648  
649  
650  
651  
652  
653  
654  
655  
656  
657  
658  
659  
660  
661  
662  
663  
664  
665  
666  
667  
668  
669  
670  
671  
672  
673  
674  
675  
676  
677  
678  
679  
680  
681  
682  
683  
684  
685  
686  
687  
688  
689  
690  
691  
692  
693  
694  
695  
696  
697  
698  
699  
700  
701  
702  
703  
704  
705  
706  
707  
708  
709  
710  
711  
712  
713  
714  
715  
716  
717  
718  
719  
720  
721  
722  
723  
724  
725  
726  
727  
728  
729  
730  
731  
732  
733  
734  
735  
736  
737  
738  
739  
740  
741  
742  
743  
744  
745  
746  
747  
748  
749  
750  
751  
752  
753  
754  
755  
756  
757  
758  
759  
760  
761  
762  
763  
764  
765  
766  
767  
768  
769  
770  
771  
772  
773  
774  
775  
776  
777  
778  
779  
780  
781  
782  
783  
784  
785  
786  
787  
788  
789  
790  
791  
792  
793  
794  
795  
796  
797  
798  
799  
800  
801  
802  
803  
804  
805  
806  
807  
808  
809  
810  
811  
812  
813  
814  
815  
816  
817  
818  
819  
820  
821  
822  
823  
824  
825  
826  
827  
828  
829  
830  
831  
832  
833  
834  
835  
836  
837  
838  
839  
840  
841  
842  
843  
844  
845  
846  
847  
848  
849  
850  
851  
852  
853  
854  
855  
856  
857  
858  
859  
860  
861  
862  
863  
864  
865  
866  
867  
868  
869  
870  
871  
872  
873  
874  
875  
876  
877  
878  
879  
880  
881  
882  
883  
884  
885  
886  
887  
888  
889  
890  
891  
892  
893  
894  
895  
896  
897  
898  
899  
900  
901  
902  
903  
904  
905  
906  
907  
908  
909  
910  
911  
912  
913  
914  
915  
916  
917  
918  
919  
920  
921  
922  
923  
924  
925  
926  
927  
928  
929  
930  
931  
932  
933  
934  
935  
936  
937  
938  
939  
940  
941  
942  
943  
944  
945  
946  
947  
948  
949  
950  
951  
952  
953  
954  
955  
956  
957  
958  
959  
960  
961  
962  
963  
964  
965  
966  
967  
968  
969  
970  
971  
972  
973  
974  
975  
976  
977  
978  
979  
980  
981  
982  
983  
984  
985  
986  
987  
988  
989  
990  
991  
992  
993  
994  
995  
996  
997  
998  
999  
1000
- Patients aged 20 years or older.

#### Exclusion criteria

- Patients with a history of treatment with radiation therapy to the maxillofacial region.
- Patients with primary or metastatic tumours in the maxillofacial region.
- Patients treated with intravenous BP.

The data collected were diagnosis, date of diagnosis, sex, birthdate, and the doses and dates when osteoporosis medications, steroids, anticancer drugs, diabetes drugs and HbA1c tests were administered.

### **Conversion of the text form of the narrative criteria to computable criteria**

To identify eligible patients and collect the necessary data from the EMRs, narrative criteria and data must be converted to computable criteria. Such computable criteria include entities, attributes, logical operators (i.e., 'and' and 'or'), codes, and parameters [33-37]. The clinical research purpose and clinical practice demands made it necessary to perform this task.

We manually executed the conversion from text eligibility criteria to computable criteria. As an example of the conversion from narrative criteria to computable criteria, we present the following two-step conversion procedure:

Step 1: Convert the narrative criteria into entity-level criteria.

Medical concepts expressed as narrative criteria are mapped onto entities in the data model and converted into entity-level criteria. This task is manually performed at the protocol

1  
2  
3  
4 development stage of the study by the investigators. For each entity, a criterion is created to  
5  
6  
7 extract patients who meet each condition. If exclusive conditions for the same entity must be  
8  
9  
10 defined, a different criterion is created. Additionally, the list of codes for drugs and diagnoses  
11  
12  
13 (i.e., ICD-10) is created, and the period of treatments and others are defined by investigators.

14  
15 In this study, we mapped ‘osteoporotic patients’ onto two entities (i.e., ‘diagnosis’ and  
16  
17  
18 ‘medications and injections’) and converted it to a combination of two criteria (i.e.,  
19  
20  
21 ‘diagnosis of osteoporosis’ and ‘osteoporosis drug administration’). In the test research, we  
22  
23  
24 defined the entity-level criteria according to the entered diagnosis and ordered treatments  
25  
26  
27 rather than the diagnostic criteria of the disease. This process reflects that the test research  
28  
29  
30 aimed to estimate some risks of osteomyelitis of the jaw with BP administration instead of  
31  
32  
33 diagnosing osteoporosis patients accurately. The recorded diagnosis in the EMR was typically  
34  
35  
36 designed to ensure payment for medical claims. We thus sought to reduce the number of false  
37  
38  
39 positives by extracting patients with a given treatment type.

40  
41  
42 Step 2: Convert entity-level criteria into attribute-level criteria (i.e., computable criteria).

43  
44  
45  
46 The abovementioned corresponding codes, date and parameters are mapped onto attributes of  
47  
48  
49 the entity-level criteria, and these factors become computable criteria.  
50

### 51 52 53 **Creating a targeted patient list**

54  
55  
56  
57 A targeted patient list is created from the entire set of patients for whom EMRs have been  
58  
59  
60

1  
2  
3  
4 obtained by defining logical queries (i.e., programs defined by the GUI) based on the  
5  
6  
7 computable criteria included in the ERS.  
8  
9

10 Logical queries are first defined in the ERS to identify patients who meet the conditions for  
11  
12  
13 each criterion. The ERS automatically generates the SQL necessary for data extraction  
14  
15  
16 according to the logical queries. Logical queries are then defined to include or exclude  
17  
18  
19 eligible patients who meet each criterion for the demographic entity. The targeted patient list  
20  
21  
22 is created by executing the logical query. Figure 2 presents an example of an SQL  
23  
24  
25 automatically generated by the ERS.  
26  
27  
28

29 We thus designed our data model to enable the creation of a targeted patient list by defining  
30  
31  
32 the patients extracted from each criterion (i.e., 'in' or 'not in') as conditions for the  
33  
34  
35 demographic entity that was the unique patient list for the entire hospital. If logical queries  
36  
37  
38 are defined using our method, even if the eligibility criteria are complicated, it is not  
39  
40  
41 necessary to dramatically change the SQL structure generated in the ERS.  
42  
43  
44

#### 45 **Flagging entries for investigators to confirm**

46  
47

48 To improve research data accuracy, confirmation by the investigators is necessary. When  
49  
50  
51 confirmation is required, additional information is linked.  
52  
53  
54

55 For the targeted patient list, logical queries are defined to flag certain items according to the  
56  
57  
58 investigators' interest. Necessary logical queries are first defined for each criterion. Logical  
59  
60

1  
2  
3  
4 queries are then defined for addition to the patient list as '1' if the data correspond or '0' if  
5  
6 they do not. Data sets created by these operations are joined by 'union' and pivoted on a  
7  
8 cross-tabulation list using statistical analysis software. We show an example of an SQL  
9  
10 generated by the ERS in Figure 3.  
11  
12  
13

### 14 15 16 **Create reports for investigators to confirm** 17

18  
19  
20 To help investigators confirm the targeted patient list, reports are created by linking the  
21  
22 findings for diagnostic imaging, pathological diagnosis, operations, and other findings.  
23  
24 Investigators confirm these entries using the reports and EMR information, including  
25  
26 progress notes and images. When the diagnosis history, medication, laboratory results,  
27  
28 progress notes, and other information are necessary, the same operation is executed for each  
29  
30 instance. For example, the list of radiological findings involves 'patient id', 'study category',  
31  
32 'report name', 'diagnosis', 'findings', and 'comment'. The reports may improve the  
33  
34 investigators' confirmation efficiency because they prevent the need to refer to the medical  
35  
36 records for each patient who needs confirmation.  
37  
38  
39  
40  
41  
42  
43  
44  
45  
46

### 47 **Confirmation by the investigator and execution of the statistical analyses.** 48

49  
50  
51 The investigators confirm the accumulated data and execute the statistical analysis. In this  
52  
53 test research, two oral and maxillofacial surgeons diagnosed cases by a chart review with an  
54  
55 observation of imaging findings [47].  
56  
57  
58  
59  
60

## Systemic evaluation

To evaluate our system, we collected information about the research period using the recall method. For the accuracy of the data collected by the ERS, we evaluated the results after they were confirmed by the investigator.

## RESULTS

### Computable criteria, datasets, and system evaluation

We present the computable criteria in Table 1. To increase data accuracy, we collected all of the exclusion criteria for the investigators to confirm. As Table 1 shows, we extracted information from EMRs. For investigator confirmation, we also reported all targeted patients using the following lists: osteoporosis drugs administered, oral BP administered, intravenous BP administered, diabetes drugs administered, anticancer drugs administered, steroid drugs administered, osteoporosis diagnoses, oral cancer diagnoses, patients diagnosed with inflammation of the jaw, patients diagnosed with other suspicious diseases, patients diagnosed with diabetes, HbA1c values, radiological findings, pathological findings, and radioisotope findings. These data were extracted from the ERS for statistical analyses, presented in CSV format, and analysed using statistics software.

**Table 1.** Computable criteria for our test research



| Criterion                                                           | Entity                           | Operator symbol | Attribute     | Operator symbol | Parameter                                            |
|---------------------------------------------------------------------|----------------------------------|-----------------|---------------|-----------------|------------------------------------------------------|
| Created a targeted patient list                                     |                                  |                 |               |                 |                                                      |
| Inclusion criteria:<br>Osteoporosis diagnosis                       | Diagnosis                        | -               | ICD10Code     | In              | (osteoporosis ICD10 code list)                       |
|                                                                     |                                  | and             | DiagnosisDate | >=              | '10/01/2000'                                         |
|                                                                     |                                  | and             | DiagnosisDate | <=              | '09/30/2010'                                         |
|                                                                     |                                  | and             | SuspectedFlag | =               | Fixed                                                |
| Inclusion criteria:<br>Osteoporosis drug<br>administrations         | Medications<br>and<br>Injections | -               | DrugCode      | in              | (osteoporosis drugs code list)                       |
|                                                                     |                                  | and             | ExecuteDate   | >=              | '10/01/2000'                                         |
|                                                                     |                                  | and             | ExecuteDate   | <=              | '09/30/2010'                                         |
| Added a flag for investigators to confirm the targeted patient list |                                  |                 |               |                 |                                                      |
| Exclusion criteria:<br>Oral cancer diagnosis                        | Diagnosis                        | -               | ICD10Code     | in              | (oral cancer ICD10 code list)                        |
|                                                                     |                                  | and             | DiagnosisDate | >=              | '10/01/2000'                                         |
|                                                                     |                                  | and             | DiagnosisDate | <=              | '09/30/2010'                                         |
|                                                                     |                                  | and             | SuspectedFlag | =               | Fixed                                                |
| Exclusion criteria:<br>Intravenous BP<br>administrations            | Medications<br>and<br>Injections | -               | DrugCode      | in              | (intravenous BP drugs code list)                     |
|                                                                     |                                  | and             | ExecuteDate   | >=              | '10/01/2000'                                         |
|                                                                     |                                  | and             | ExecuteDate   | <=              | '09/30/2010'                                         |
| Oral BP administrations                                             | Medications<br>and<br>Injections | -               | DrugCode      | in              | (oral BP drugs code list)                            |
|                                                                     |                                  | and             | ExecuteDate   | >=              | '10/01/2000'                                         |
|                                                                     |                                  | and             | ExecuteDate   | <=              | '09/30/2010'                                         |
| Inflammatory jaw<br>condition diagnosis                             | Diagnosis                        | -               | ICD10Code     | in              | (inflammatory conditions of jaws<br>ICD10 code list) |
|                                                                     |                                  | and             | DiagnosisDate | >=              | '10/01/2000'                                         |
|                                                                     |                                  | and             | DiagnosisDate | <=              | '09/30/2010'                                         |
|                                                                     |                                  | and             | SuspectedFlag | =               | Fixed                                                |
| Other suspicious disease<br>diagnosis                               | Diagnosis                        | -               | ICD10Code     | in              | (other suspicious disease ICD10<br>code list)        |
|                                                                     |                                  | and             | DiagnosisDate | >=              | '10/01/2000'                                         |
|                                                                     |                                  | and             | DiagnosisDate | <=              | '09/30/2010'                                         |
|                                                                     |                                  | and             | SuspectedFlag | =               | Fixed                                                |
| Diabetes diagnosis                                                  | Diagnosis                        | -               | ICD10Code     | in              | (diabetes ICD10 code list)                           |
|                                                                     |                                  | and             | DiagnosisDate | >=              | '10/01/2000'                                         |
|                                                                     |                                  | and             | DiagnosisDate | <=              | '09/30/2010'                                         |
|                                                                     |                                  | and             | SuspectedFlag | =               | Fixed                                                |

|                                                       |                    |     |                    |          |                                   |
|-------------------------------------------------------|--------------------|-----|--------------------|----------|-----------------------------------|
| Steroid drug administrations                          | Medications        | -   | DrugCode           | in       | (steroid drugs code list)         |
|                                                       | and                | and | ExecuteDate        | >=       | '10/01/2000'                      |
|                                                       | Injections         | and | ExecuteDate        | <=       | '09/30/2010'                      |
| Anticancer drug administrations                       | Medications        | -   | DrugCode           | in       | (anticancer drugs code list)      |
|                                                       | and                | and | ExecuteDate        | >=       | '10/01/2000'                      |
|                                                       | Injections         | and | ExecuteDate        | <=       | '09/30/2010'                      |
| Diabetes drug administrations                         | Medications        | -   | DrugCode           | in       | (diabetes drugs code list)        |
|                                                       | and                | and | ExecuteDate        | >=       | '10/01/2000'                      |
|                                                       | Injections         | and | ExecuteDate        | <=       | '09/30/2010'                      |
| HbA1c test execution                                  | Laboratory Test    | -   | LaboratoryTestCode | in       | (HbA1c test code)                 |
|                                                       |                    | and | TestDate           | >=       | '10/01/2000'                      |
|                                                       |                    | and | TestDate           | <=       | '09/30/2010'                      |
| Created reports for confirmation by the investigators |                    |     |                    |          |                                   |
| Radiological finding reports                          | Diagnostic Studies | -   | ReportName         | in       | (report name list of oral region) |
| Pathologic finding reports                            | Diagnostic Studies | -   | SampleName         | contains | 'bone'                            |
|                                                       |                    | or  | SampleName         | contains | 'jaw'                             |
| Radio isotope finding reports                         | Diagnostic Studies | -   | -                  | -        | -                                 |

BP, bisphosphonates; ICD, International Classification of Diseases; ID, identifications

Among the approximately 800,000 cases at our hospital, 8,772 were categorised using the terms 'Inclusion criteria: Osteoporosis diagnosis'; among this group, 7,195 were further categorised using 'Inclusion criteria: Osteoporosis drug administration'. We then calculated the time that had elapsed since the osteoporosis diagnosis, determined that 7,062 patients were aged 20 years or older, and created a targeted patient list. Among those on the targeted patient list, 23 patients were placed under the heading 'Exclusion criteria: Oral cancer diagnosis', 110 under 'Exclusion criteria: Intravenous BP administration', 4,200 under 'Oral

1  
2  
3  
4 BP administration', 84 under 'Inflammatory jaw condition diagnosis', 2,064 as 'Other  
5  
6 suspicious disease diagnosis', 1,700 as 'Diabetes diagnosis', 4,551 as 'Steroid drug  
7  
8 administration', 904 as 'Anticancer drug administrations', 1,055 as 'Diabetes drug  
9  
10 administrations', and 3,641 as 'HbA1c test execution'. Because of the end point considered,  
11  
12 patients who were classified under 'Inflammatory jaw condition diagnosis' or 'Other  
13  
14 suspicious disease diagnosis' were confirmed using predefined hierarchical diagnostic criteria  
15  
16 by investigators who performed the statistical analyses and arranged the research results. We  
17  
18 show the schema of data collection and confirmation as Figure 4 [47].  
19  
20  
21  
22  
23  
24  
25  
26  
27

28 The accuracy of the data extracted by the ERS was then characterised. Reviewing the medical  
29  
30 records revealed that 2,817 patients were not labelled as 'Oral BP administration', including 7  
31  
32 (1 who received intravenous BP) treated at other hospitals. 6 patients had been treated with  
33  
34 radiation therapy to the oral and maxillofacial regions. Among the 72 patients classified under  
35  
36 'Inflammatory jaw condition diagnosis', 35 cases and 37 non-cases were identified.  
37  
38  
39  
40  
41  
42

43 The data extraction period lasted approximately three months. Ten meetings were held during  
44  
45 the protocol development stage to create and validate the computable criteria and the list of  
46  
47 codes for various drugs and diagnoses (i.e., ICD-10). The time required for logical query  
48  
49 definition when using the ERS was approximately 20 hours. The investigator confirmations  
50  
51 and statistical analyses took approximately four months.  
52  
53  
54  
55  
56  
57  
58  
59  
60

## DISCUSSION

We identified eligible patients for this research and extracted the data necessary for confirmation by investigators and for statistical analyses.

We asked the chart reviewers to evaluate the system in a questionnaire about ‘the effect of computer programming support for data retrieval from the EMR’, ‘the result of the data retrieval’, ‘the positive and negative aspects of our ERS use’, and ‘the aspects of our method that should be improved’. The investigators evaluating the system mentioned that the following points: 1) the method enabled them to extract the necessary data for diagnosis and drug administration without exception; 2) by screening the entire patient population at the hospital using the ERS, they could identify not just eligible patients in the department of oral and maxillofacial surgery but all eligible patients, which reduced the study bias; and 3) by creating reports for confirmation, it enabled investigators to devote their time to reading images, thus effectively reducing the time required for reviewing medical records. The aspects of our method that should be improved are the ‘lack of claim data’ and the ‘administrative complexity of EMR data use’. No negative aspects of our ERS use were noted.

The ERS allowed for the collection of information on patient eligibility by efficiently combining clinical information. Although we did not compare our method with other

1  
2  
3  
4 methods, our proposed method reduced the labour normally required from investigators and  
5  
6  
7 improved the reliability of test research results, which indicated that it was useful.  
8  
9

10 To design the ERS database, we designed a new data model optimised for patient  
11  
12 identification. The main differences between our data model and the star schema were as  
13  
14 follows: 1) demographic data, which were presented in list form in our EMR system, were  
15  
16 presented as a fact-less fact table, and 2) date, time, measurements and text information were  
17  
18 presented as a fact-less fact table, and 2) date, time, measurements and text information were  
19  
20 presented in dimension tables [32]. The most significant characteristic of our method for  
21  
22 patient identification is the use of a specialised data model in clinical research and the ability  
23  
24 to execute a large number of conversion tasks at the protocol development stage. Data can be  
25  
26 converted efficiently in a way that does not depend on the EMR database structure when  
27  
28 converting narrative criteria to computable criteria. In this research, we considered whether  
29  
30 data were extracted directly from EMRs at the protocol development stage. However, EMR  
31  
32 data were recorded in a sequential format for every medical practice, and the database  
33  
34 structure was complicated. Comprehending the location and meaning of the necessary data  
35  
36 thus required tremendous effort. It was difficult to make precise logical queries for patient  
37  
38 identification. However, because our ERS data model was arranged by subjects (e.g., tests,  
39  
40 diagnosis), it was easy to interpret the available information. Due to the standardisation of  
41  
42 computable criteria and SQL possible with the ERS, it was also possible to create computable  
43  
44 criteria in little time. Additionally, verifying the patient identification accuracy was easy  
45  
46  
47  
48  
49  
50  
51  
52  
53  
54  
55  
56  
57  
58  
59  
60

1  
2  
3  
4 because it was possible to test each individual criterion.  
5  
6

7  
8 The SQL generated by our ERS does not reduce the time required for data retrieval. Our ERS  
9  
10 also cannot retrieve information that is not in the data model. Current EMRs do not store all  
11  
12 necessary data for clinical research, including information related to pregnancy, performance  
13  
14 status, cancer stage, availability of transportation to the hospital, specific tests that are not  
15  
16 typically performed, drug regimen, outcomes (including death), and adverse events.  
17  
18 Additionally, all tests are not administered to all patients, and necessary information may  
19  
20 have been recorded in medical records at another hospital [44]. To facilitate EMR use in  
21  
22 clinical research, it is necessary to accumulate as much of this information as possible. In the  
23  
24 hospital, much of this information does not integrate well with EMRs, including test reports  
25  
26 stored only in the departmental system [50]. However, it is important to utilise this  
27  
28 information. Additionally, enabling ERS use in and across multiple institutions is also an  
29  
30 important future task.  
31  
32  
33  
34  
35  
36  
37  
38  
39  
40  
41  
42

43  
44 Currently, most clinical research studies that use data from EMRs are planned according to  
45  
46 the concept that the primary use of EMRs is for clinical practice and a secondary use is for  
47  
48 clinical research [44]. Therefore, most investigators attempt to convert the text form  
49  
50 eligibility criteria that already have been defined on a protocol to computable criteria at the  
51  
52 data collecting stage [35. 36]. However, we propose that computable criteria should not be a  
53  
54 result of the automated conversion of narrative criteria but rather a result of research  
55  
56  
57  
58  
59  
60

1  
2  
3  
4 preparation involving medical concepts that are not expressed logically or explicitly in the  
5  
6  
7 narrative criteria. Some medical concepts may be interpreted differently depending on the  
8  
9  
10 research and the investigator caring for the patients. Additionally, current eligibility criteria  
11  
12  
13 are vague or complex, and they do not consider the use of the actual EMR. To convert  
14  
15  
16 computable criteria appropriately, high-level medical decisions to answer the research  
17  
18  
19 question are required. Therefore, we thought that a large amount of the conversion of the  
20  
21  
22 eligibility criteria to computable criteria should be executed at the protocol development  
23  
24  
25 stage. In addition, the conversion process should be divided into entity-level conversions that  
26  
27  
28 require higher medical decisions and attribute-level conversions. To reduce the burden of  
29  
30  
31 conversion, it may be useful to apply NLP technology for the conversion from entity-level  
32  
33  
34 criteria to attribute-level criteria. Moreover, it is important to further discuss protocol  
35  
36  
37 standardisation, including eligibility criteria representation for computable use. For instance,  
38  
39  
40 the attribute-level criteria that describe the search conditions in detail may be useful in global  
41  
42  
43 studies to address diseases that vary according to the diagnostic criteria used in each country.

44  
45 Concerning EMR data accuracy, the ICD10 code (osteomyelitis of the jaw) sensitivity was  
46  
47  
48 48.6% (35/72). The investigators reported 6 simple diagnosis errors, 7 oral BP  
49  
50  
51 administrations at other hospitals, and 6 patients who were treated with radiation therapy in  
52  
53  
54 the oral and maxillofacial region [47]. For the accuracy of current EMRs, the investigators  
55  
56  
57 had to confirm the information. However, the EMRs provided rich confirmation data and  
58  
59  
60

1  
2  
3  
4 were useful in improving research data accuracy. In this study, we checked the data from  
5  
6  
7 actual EMRs manually and identified patients precisely and extensively using coded  
8  
9  
10 information, narrative information, and images. However, only information from existing  
11  
12 EMRs was available. Current EMRs have a high degree of flexibility in data entry and are not  
13  
14 currently managed for research purposes, which decreases their reliability. It is necessary to  
15  
16 improve data quality through quality control without placing too much of a burden on clinical  
17  
18 practice. Alternatively, it may be possible to organise data sufficiently before research use  
19  
20 [51-53]. Standardising the terminology and exchange formats used in the healthcare setting  
21  
22 has facilitated international discourse [46, 54-58]. It is necessary to further discuss not only  
23  
24 clinical practice but also research purposes, particularly how to utilise various standards when  
25  
26 using EMRs beyond the hospital setting.  
27  
28  
29  
30  
31  
32  
33  
34  
35

## 36 **CONCLUSION**

37  
38  
39  
40 We propose a pragmatic method for EMR-based observational studies. Our ERS is already  
41  
42 used to support hospital-based cohort studies, clinical trial recruitment, and the eClinical trial  
43  
44 infrastructure [44] at our centre. We believe an efficient ERS and standardised data  
45  
46 processing model are essential to facilitate clinical research that utilises EMRs.  
47  
48  
49  
50

## 51 **Acknowledgements**

52  
53  
54  
55  
56  
57 The authors would like to acknowledge the staff of the department of medical informatics of  
58  
59  
60



1  
2  
3  
4 Kyoto University Hospital for their generous support.  
5  
6

### 7 8 **Funding** 9

10  
11 This work was supported by the Coordination, Support and Training Program for  
12  
13 Translational Research of the Ministry of Education, Culture, Sports, Science and Technology  
14  
15 of Japan and by Grants-in-Aid for Scientific Research of Japan (23790566).  
16  
17  
18  
19

### 20 21 **Competing interests** 22

23  
24  
25 None.  
26  
27

### 28 29 **Contributors** 30

31  
32 KY designed the study, developed the ERS system, identified the computable eligibility  
33  
34 criteria, wrote logical queries, collected data, and wrote the manuscript. ES is grant holder  
35  
36 who designed the study, developed the ERS system, and wrote and edited the manuscript. TY  
37  
38 designed and conducted the 'Risk of osteomyelitis of the jaw induced by oral  
39  
40 bisphosphonates in patients taking medications for osteoporosis: A hospital-based cohort  
41  
42 study in Japan' (BRONJ study) study and the current study, identified the computable  
43  
44 eligibility criteria, and wrote and edited the manuscript. KA and MY designed and conducted  
45  
46 the BRONJ study. ST designed the study and provided comments and feedback. KB is the  
47  
48 principal investigator of the BRONJ study. MY owns the ERS system and supervised the  
49  
50  
51  
52  
53  
54  
55  
56  
57  
58  
59  
60

1  
2  
3  
4 study. MF supervised the study and provided comments and feedback. All of the authors read  
5  
6  
7 and approved the final manuscript.  
8  
9

#### 10 **Provenance and peer review**

11  
12  
13  
14 Not commissioned; externally peer reviewed.  
15  
16

#### 17 **Data sharing statement**

18  
19  
20  
21  
22 No other data are available to share.  
23  
24  
25  
26  
27  
28  
29  
30  
31  
32  
33  
34  
35  
36  
37  
38  
39  
40  
41  
42  
43  
44  
45  
46  
47  
48  
49  
50  
51  
52  
53  
54  
55  
56  
57  
58  
59  
60

**REFERENCES**

1. Embi PJ, Payne PR. Clinical research informatics: challenges, opportunities and definition for an emerging domain. *J Am Med Inform Assoc.* 2009;**16**(3):316-27
2. Prokosch HU, Ganslandt T. Perspectives for medical informatics. Reusing the electronic medical record for clinical research. *Methods Inf Med.* 2009;**48**(1):38-44.
3. Wasserman RC. Electronic medical records (EMRs), epidemiology, and epistemology: reflections on EMRs and future pediatric clinical research. *Acad Pediatr.* 2011;**11**(4):280-7.
4. Dean BB, Lam J, Natoli JL, et al. Review: Use of electronic medical records for health outcomes research: A literature review. *Med Care Res Rev* 2009;**66**(6):611-38.
5. Tannen RL, Weiner MG, Marcus SM. Simulation of the Syst-Eur randomized control trial using a primary care electronic medical record was feasible. *J Clin Epidemiol* 2006;**59**(3):254-64.
6. Williams JG, Cheung WY, Cohen DR. Can randomised trials rely on existing electronic data? A feasibility study to explore the value of routine data in health technology assessment. *Health Technol Assess* 2003;**7**(26): iii, v-x, 1-117.
7. Yamamoto K, Matsumoto S, Tada H, et al. A data capture system for outcomes studies that integrates with electronic health records: development and potential uses. *J Med Syst*

1  
2  
3  
4 2008;**32**(5):423–7.  
5  
6

7  
8 8. Yamamoto K, Matsumoto S, Yanagihara K, et al. A data-capture system for post-marketing  
9  
10 surveillance of drugs that integrates with hospital electronic health records. Open Access J  
11  
12 Clin Trials 2011;**3**:21–6.  
13  
14

15  
16  
17 9. Embi PJ, Jain A, Clark J, et al. Effect of a clinical trial alert system on physician  
18  
19 participation in trial recruitment. Arch Intern Med 2005;**165**(19):2272-7.  
20  
21  
22

23  
24 10. Campbell MK, Snowdon C, Francis D, et al. Recruitment to randomised trials: strategies  
25  
26 for trial enrollment and participation study. The STEPS study. Health Technol Assess  
27  
28 2007;**11**:iii, ix-105.  
29  
30  
31

32  
33  
34 11. Dugas M, Lange M, Müller-Tidow C, et al. Routine data from hospital information  
35  
36 systems can support patient recruitment for clinical studies. Clin Trials 2010;**7**(2):183-9.  
37  
38  
39

40  
41 12. Thadani SR, Weng C, Bigger JT, et al. Electronic screening improves efficiency in  
42  
43 clinical trial recruitment. J Am Med Inform Assoc 2009;**16**(6):869-73.  
44  
45  
46

47  
48 13. Torgerson JS, Arlinger K, Käppi M, et al. Principles for enhanced recruitment of subjects  
49  
50 in a large clinical trial: The XENDOS study experience. Control Clin Trials  
51  
52 2001;**22**(5):515-25.  
53  
54  
55

56  
57 14. Kristianson KJ, Ljunggren H, Gustafsson LL. Data extraction from a semi-structured  
58  
59  
60

1  
2  
3  
4 electronic medical record system for outpatients: a model to facilitate the access and use of  
5  
6 data for quality control and research. *Health Inform J* 2009;**15**(4):305–319.  
7  
8

9  
10  
11 15. Shim JP. Past, present, and future of decision support technology. *Decis Support Syst*  
12  
13 2002;**33**(2):111-26.  
14

15  
16  
17 16. Prat N. A UML-based data warehouse design method. *Decis Support Syst*  
18  
19 2006;**42**(3):1449-73.  
20  
21

22  
23  
24 17. Park YT. An empirical investigation of the effects of data warehousing on decision  
25  
26 performance. *Inform Manag* 2006;**43**(1):51.  
27  
28

29  
30  
31 18. Schlaps D, Schmid T. Data warehousing in clinical research and development - From  
32  
33 clinical data to knowledge portals. *Pharmind* 2004;**66**(5a):637-46.  
34  
35

36  
37  
38 19. Grant A, Moshyk A, Diab H, et al. Integrating feedback from a clinical data warehouse  
39  
40 into practice organisation. *Int J Med Inform* 2006;**75**(3-4):232-9.  
41  
42

43  
44 20. Junttila K, Meretoja R, Seppälä A, et al. Data warehouse approach to nursing  
45  
46 management. *J Nurs Manag* 2007;**15**(2):155-61.  
47  
48

49  
50  
51 21. Rubin DL, Desser TS. A data warehouse for integrating radiologic and pathologic data. *J*  
52  
53 *Am Coll Radiol* 2008;**5**(3):210-7.  
54  
55

56  
57  
58 22. Johnson SB. Generic data modeling for clinical repositories. *J Am Med Inform Assoc*  
59  
60

1  
2  
3  
4 1996;**3**(5):328-39.  
5  
6

7  
8 23. Nadkarni PM, Brandt C. Data extraction and ad hoc query of an entity—attribute—value  
9  
10 database. *J Am Med Inform Assoc* 1998;**5**:511-27.  
11  
12

13  
14 24. Anhøj J. Generic design of Web-based clinical databases. *J Med Internet Res*  
15  
16 2003;**5**(4):e27.  
17  
18

19  
20  
21 25. Chen RS, Nadkarni P, Marenco L, et al. Exploring performance issues for a clinical  
22  
23 database organized using an entity-attribute-value representation. *J Am Med Inform Assoc*  
24  
25 2000;**7**:475-87.  
26  
27

28  
29  
30 26. Dinu V, Nadkarni P. Guidelines for the effective use of entity-attribute-value modeling for  
31  
32 biomedical databases. *Int J Med Inform* 2007;**76**:769-79.  
33  
34

35  
36  
37 27. Corwin J, Silberschatz A, Miller PL, et al. Dynamic tables: an architecture for managing  
38  
39 evolving, heterogeneous biomedical data in relational database management systems. *J Am*  
40  
41 *Med Inform Assoc* 2007;**14**:86-93.  
42  
43

44  
45  
46 28. Wade TD, Hum RC, Murphy JR. A dimensional bus model for integrating clinical and  
47  
48 research data. *J Am Med Inform Assoc* 2011;**1**:96-102.  
49  
50

51  
52  
53 29. Pardillo J, Mazón JN. Model-driven development of OLAP metadata for relational data  
54  
55 warehouses. *Comput Stand Interfac* 2012;**34**(1):189-202.  
56  
57  
58  
59  
60

- 1  
2  
3  
4 30. Hettler M. Data mining goes multidimensional. *Health Inform.* 1997;**14**(3):43-6, 48, 51-6.  
5  
6  
7  
8 31. Gordon BD, Asplin BR. Using online analytical processing to manage emergency  
9  
10 department operations. *Acad Emerg Med* 2004;**11**(11):1206-12.  
11  
12  
13  
14 32. Kimball R, Reeves L, Ross M, et al. *The Data Warehouse Lifecycle Toolkit*. New York:  
15  
16 John Wiley, 1998.  
17  
18  
19  
20  
21 33. Wang D, Peleg M, Tu SW, et al. Representation primitives, process models and patient  
22  
23 data in computer-interpretable clinical practice guidelines: a literature review of guideline  
24  
25 representation models. *Int J Med Inform.* 2002 **18**;68(1-3)  
26  
27  
28  
29  
30  
31 34. Weng C, Tu SW, Sim I, et al. Formal representation of eligibility criteria: A literature  
32  
33 review. *J Biomed Inform* 2010;**43**(3):451-67.  
34  
35  
36  
37  
38 35. Lonsdale DW, Tustison C, Parker CG, et al. Assessing clinical trial eligibility with logic  
39  
40 expression queries. *Data Knowl Eng* 2008;**66**(1):3-17.  
41  
42  
43  
44 36. Tu SW, Peleg M, Carini S, et al. A practical method for transforming free-text eligibility  
45  
46 criteria into computable criteria. *J Biomed Inform* 2011;**44**(2):239-50.  
47  
48  
49  
50  
51 37. Sordo M, Boxwala AA, Ogunyemi O, et al. Description and status update on GELLO: a  
52  
53 proposed standardized object-oriented expression language for clinical decision support. *Stud*  
54  
55  
56  
57 *Health Technol Inform.* 2004;**107**:164-8.  
58  
59  
60

1  
2  
3  
4 38. Séroussi B, Bouaud J. Using OncoDoc as a computer-based eligibility screening system  
5  
6  
7 to improve accrual onto breast cancer clinical trials. *Artif Intell Med* 2003;**29**(1-2):153-67.  
8  
9

10 39. CDISC ASPIRE: Integration of clinical research and EHR: Eligibility coding standards.  
11  
12  
13 [http://crisummit2010.amia.org/files/symposium2008/S14\\_Niland.pdf](http://crisummit2010.amia.org/files/symposium2008/S14_Niland.pdf) (accessed 31 Mar  
14  
15  
16 2012).  
17  
18  
19

20 40. CDISC Study Design Model: SDM-XML Version 1.0.  
21  
22  
23 <http://www.cdisc.org/stuff/contentmgr/files/0/8c85b168e80d6834ded59339b55fdb7/misc/cd>  
24  
25  
26 [isc\\_sdm\\_xml\\_1.0.pdf](isc_sdm_xml_1.0.pdf) (accessed 31 Mar 2012).  
27  
28  
29

30 41. US. National Cancer Institute (NCI). caMATCH.  
31  
32  
33 <https://cabig.nci.nih.gov/community/tools/caMATCH> (accessed 31 Mar 2012).  
34  
35  
36

37 42. Jagannathan V, Mullett CJ, Arbogast JG, et al. Assessment of commercial NLP engines for  
38  
39 medication information extraction from dictated clinical notes. *Int J Med Inform*  
40  
41 2009;**78**(4):284-91.  
42  
43  
44

45  
46 43. Pakhomov S, Weston SA, Jacobsen SJ, et al. Electronic medical records for clinical  
47  
48 research: application to the identification of heart failure. *Am J Manag Care*  
49  
50 2007;**13**(6):281-8.  
51  
52  
53

54  
55  
56 44. Yamamoto K, Yamanaka K, Hatano E, et al. An eClinical trial system for cancer that  
57  
58  
59  
60



1  
2  
3  
4 integrates with clinical pathways and electronic medical records. Clin trials 2012 9: 408-417.  
5  
6

7  
8 45. Matsumura Y, Kuwata S, Yamamoto Y, et al. Template-based data entry for general  
9  
10 description in medical records and data transfer to data warehouse for analysis. Stud Health  
11  
12 Technol Inform 2007;**129**(Pt 1):412–416.  
13  
14

15  
16  
17 46. World Health Organization (WHO). International Classification of Diseases (ICD).  
18  
19  
20 <http://www.who.int/classifications/icd/en/> (accessed 31 Mar 2012).  
21  
22

23  
24 47. Yamazaki T, Yamori M, Yamamoto K, et al, Risk of osteomyelitis of the jaw induced by  
25  
26 oral bisphosphonates in patients taking medications for osteoporosis: A hospital-based cohort  
27  
28 study in Japan, Bone 2012: 51(5) 882–887.  
29  
30  
31

32  
33  
34 48. Fellows JL, Rindal DB, Barasch A, et al. ONJ in two dental practice-based research  
35  
36 network regions. J Dent Res 2011;**90**(4):433-8.  
37  
38

39  
40 49. Vestergaard P, Schwartz K, Rejnmark L, et al. Oral bisphosphonate use increases the risk  
41  
42 for inflammatory jaw disease: a cohort study. J Oral Maxillofac Surg. 2012 70(4):821-829.  
43  
44

45  
46  
47 50. Shortliffe EH, Cimino JJ. Biomedical Informatics: Computer Applications in Health Care  
48  
49 and Biomedicine. Health Informatics series. Springer, 2006.  
50  
51

52  
53  
54 51. McFadden E. Management of data in clinical trials. 2nd ed. Hoboken, NJ:  
55  
56 Wiley-Interscience, 2007.  
57  
58  
59  
60

- 1  
2  
3  
4 52. Zhengwu L, Jing S. Clinical data management: current status, challenges, and future  
5  
6  
7 directions from industry perspectives. *Open Access J Clin Trials* 2010;**2**: 93–105.  
8  
9  
10  
11 53. Data Management Association (DAMA) International. Data management body of  
12  
13 knowledge. <http://www.dama.org/i4a/pages/index.cfm?pageid=3364> (accessed 31 Mar 2012).  
14  
15  
16  
17 54. MedDRA MSSO. MedDRA MSSO. <http://www.meddramsso.com/> (accessed 31 Mar  
18  
19 2012).  
20  
21  
22  
23  
24 55. US National Library of Medicine. SNOMED clinical terms,  
25  
26  
27 [http://www.nlm.nih.gov/research/umls/Snomed/snomed\\_main.html](http://www.nlm.nih.gov/research/umls/Snomed/snomed_main.html) (accessed 31 Mar 2012).  
28  
29  
30  
31 56. Clinical Data Interchange Standards Consortium (CDISC). Study data tabulation model  
32  
33 (SDTM). <http://www.cdisc.org/sdtm> (accessed 31 Mar 2012).  
34  
35  
36  
37 57. Huff S. Development of the logical observation identifier names and codes (LOINC)  
38  
39  
40 vocabulary. *J Am Med Inform Assoc* 1998;**5**(3):276-92.  
41  
42  
43  
44 58. Health level seven (HL7). <http://www.hl7.com/> (accessed 31 Mar 2012).  
45  
46  
47  
48  
49  
50  
51  
52  
53  
54  
55  
56  
57  
58  
59  
60

1  
2  
3  
4 **FIGURE CAPTIONS**  
5  
6  
7

8 **Figure 1.** Data model for our EMR retrieval system.  
9

10  
11 **Figure 2.** Example SQL to create the target patient list.  
12

13  
14  
15 **Figure 3.** Example SQL to flag the target patient report for investigator confirmation.  
16  
17

18  
19 **Figure 4.** Schema of data collection and confirmation.  
20  
21  
22  
23  
24  
25  
26  
27  
28  
29  
30  
31  
32  
33  
34  
35  
36  
37  
38  
39  
40  
41  
42  
43  
44  
45  
46  
47  
48  
49  
50  
51  
52  
53  
54  
55  
56  
57  
58  
59  
60
